1 **Title page**

2

3 **Title**

4 **naRNA is a canonical neutrophil extracellular trap (NET) component**  
5 **and novel inflammation-amplifying composite DAMP**

6

7 **Running title**

8 naRNA – canonical NET component and composite DAMP

9 **Authors**

10 Francesca Bork<sup>1</sup>, Carsten L. Greve<sup>1</sup>, Christine Youn<sup>2</sup>, Sirui Chen<sup>1</sup>, Yu Wang<sup>2</sup>, Masoud Nasri<sup>3</sup>, Jule  
11 Focken<sup>4</sup>, Jasmin Scheurer<sup>4</sup>, Pujan Engels<sup>1</sup>, Marissa Dubbelaar<sup>1,5</sup>, Katharina Hipp<sup>6</sup>, Birgit Schitteck<sup>4,7,8</sup>,  
12 Stefanie Bugl<sup>1</sup>, Markus W. Löffler<sup>1,7,9</sup>, Julia Skokowa<sup>3,7</sup>, Nathan K. Archer<sup>2</sup> (ORCID: 0000-0002-8212-  
13 8985), Alexander N.R. Weber<sup>1,7,8\*</sup> (ORCID: 0000-0002-8627-7056)

14 **Author information**

15 <sup>1</sup>Interfaculty Institute for Cell Biology, Department of Immunology, University of Tübingen, Auf der  
16 Morgenstelle 15, 72076 Tübingen, Germany

17 <sup>2</sup>Department of Dermatology, Johns Hopkins University School of Medicine, Baltimore, MD 21231, USA

18 <sup>3</sup>Division of Translational Oncology, Department of Oncology, Hematology, Clinical Immunology and  
19 Rheumatology, University Hospital Tübingen, Otfried-Müller Str. 10, 72076 Tübingen, Germany

20 <sup>4</sup>Division of Dermatooncology, Department of Dermatology, University Hospital Tübingen,  
21 Liebermeisterstr. 25, 72076 Tübingen, Germany

22 <sup>5</sup>Quantitative Biology Center (QBiC), University of Tübingen, Auf der Morgenstelle 10, 72076 Tübingen,  
23 Germany

24 <sup>6</sup>Electron Microscopy Facility, Max Planck Institute for Biology Tübingen, Max-Planck-Ring 5, 72076  
25 Tübingen, Germany

26 <sup>7</sup>iFIT – Cluster of Excellence (EXC 2180) "Image-Guided and Functionally Instructed Tumor Therapies",  
27 University of Tübingen, Germany

28 <sup>8</sup>CMFI – Cluster of Excellence (EXC 2124) "Controlling microbes to fight infection", University of  
29 Tübingen, Germany.

30 <sup>9</sup>Department of General, Visceral and Transplant Surgery, University Hospital Tübingen, Hoppe-Seyler-  
31 Str. 3, 72076 Tübingen, Germany and Department of Clinical Pharmacology, University Hospital  
32 Tübingen, Auf der Morgenstelle 8, 72076 Tübingen, Germany

33

34 **Corresponding Author**

35 Alexander N. R. Weber, Interfaculty Institute for Cell Biology, Department of Immunology, University  
36 of Tübingen, Auf der Morgenstelle 15, 72076 Tübingen, Germany. Tel.: +49 7071 29 87623. Fax: +49  
37 7071 29 4579. Email: [alexander.weber@uni-tuebingen.de](mailto:alexander.weber@uni-tuebingen.de); ORCID: 0000-0002-8627-7056, Twitter  
38 @aweberlab

39 **Abstract**

40 Neutrophil extracellular traps (NETs) have emerged as a key feature of cellular innate immunity  
41 mediated by polymorphonuclear neutrophils (PMNs), the primary leukocyte population in humans.  
42 Forming web-like structures composed of DNA, histones, and antimicrobial proteins, NETs trap and kill  
43 microbial invaders and thus enhance host defense. However, they have also been linked to  
44 inflammatory states, e.g. in atherosclerosis or psoriasis. Whilst DNA has been in focus as a primary  
45 structural component of NETs, we here characterize naRNA (NET-associated RNA), as a new canonical,  
46 abundant, and largely unexplored NET component. naRNA decorated all types of NETs in complex with  
47 the antimicrobial peptide LL37. In fact, naRNA was pre-associated with LL37 intracellularly as a  
48 'composite' danger-associated molecular pattern (DAMP) prior to neutrophil activation. Externalized,  
49 naRNA propagated NET formation in naïve PMN, dependent on TLR8 in humans and Tlr13 in mice, in  
50 vitro and in vivo. naRNA-TLR8/Tlr13 signaling contributed significantly to the highly sensitive pro-  
51 inflammatory response of both tissue cells, like keratinocytes, and other immune cell types, such as  
52 macrophages. Those responses could be blocked by inhibition and genetic ablation of RNA receptors  
53 or RNase treatment. Importantly, in vivo naRNA strongly drove skin inflammation whereas genetic  
54 ablation of RNA sensing drastically ameliorated skin inflammation in the imiquimod psoriasis model.  
55 Our data highlight naRNA as a novel composite DAMP signaling and amplifying neutrophil activation.  
56 Moreover, naRNA emerges as the likely driver of inflammation in conditions previously linked to NETs  
57 and extracellular RNA, suggesting blockade of TLR-mediated RNA sensing as potential new intervention  
58 target.

59 **Graphical abstract**

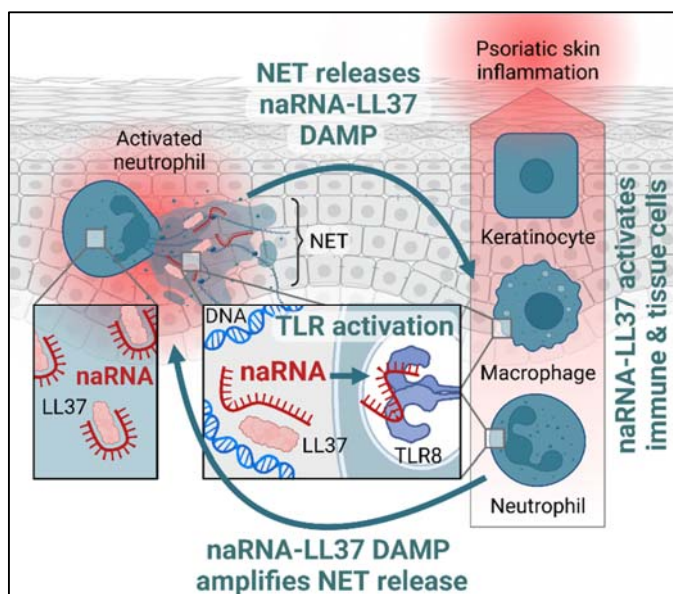

60

61 Created with biorender.com

## 62 **Introduction**

63 The formation of Neutrophil Extracellular Traps (NETs), since its discovery in 2004 (Brinkmann,  
64 Reichard et al. 2004), has emerged as a fascinating phenomenon of host defense. Hereby neutrophils,  
65 the primary leukocyte population, extrude their genomic DNA to form web-like structures that, similar  
66 to barbed wire roadblocks, trap and kill microbial invaders such as bacteria or fungi (Kruger,  
67 Saffarzadeh et al. 2015). DNA is thus a defining structural and functional feature of NETs. Additionally,  
68 DNA-associated proteins, histones and HMGB-1, antimicrobial peptides like LL37 and enzymes such as  
69 myeloperoxidase (MPO) are released during the formation of NETs and contribute to their  
70 antimicrobial function (Kruger, Saffarzadeh et al. 2015). More than 1,000 publications on NETs have  
71 sought to detail the multi-faceted phenomenon and the processes that lead to its execution (Boeltz,  
72 Amini et al. 2019). However, with the main focus devoted to DNA and protein components, another  
73 primary cellular biomolecule, RNA, has so far received very little attention in vertebrates. Interestingly,  
74 a study in insects showed that, hemocytes (macrophage-like immune cells) can release both DNA and  
75 RNA in NET-like structures during microbe-triggered clotting reactions, and in response to extracellular  
76 RNA or DNA (Altincicek, Stotzel et al. 2008). Our lab recently provided evidence of a responsiveness of  
77 human polymorphonuclear neutrophils (PMNs) to RNA, but not DNA, in combination with the  
78 antimicrobial peptide LL37, fueling neutrophil activation (Herster, Bittner et al. 2020). In addition,  
79 earlier work described a role for DNA- and RNA-LL37 complexes in the activation of plasmacytoid  
80 dendritic cells (Lande, Gregorio et al. 2007, Ganguly, Chamilos et al. 2009). This has given rise to the  
81 notion that under certain conditions tolerance to self-DNA and RNA can be broken involving the nucleic  
82 acid-sensing TLR7, TLR8 (ssRNA) and TLR9 (DNA) in humans and Tlr7, Tlr13 and Tlr9 in mice. In general,  
83 many roles have been ascribed to so-called extracellular RNA (exRNA), for example, macrophage  
84 polarization, recruitment of leukocytes to the site of inflammation, leukocyte rolling at the vascular  
85 endothelium, as well as integrin-mediated firm adhesion of immune cells and promotion of thrombosis  
86 (Preissner, Fischer et al. 2020). Additionally, exRNA is considered as a reliable biomarker for various  
87 diseases such as cancer or cardiovascular pathologies (Schmidt, Engel et al. 2005, Zerneck and  
88 Preissner 2016). However, RNA being considered a short-lived biomolecule, physiological sources of  
89 exRNA have been somewhat unclear. Under sterile conditions, vascular injury, tissue damage, or  
90 ischemia have been suggested to trigger release of exRNA along with other cellular material (Preissner,  
91 Fischer et al. 2020). However, it remains unclear whether these relatively slow processes could amount  
92 to physiologically detectable exRNA amounts in the serum of patients, or whether a rapid, as-yet  
93 unidentified process of RNA extrusion would have to be postulated.

94 We speculated that RNA contained in NETs, so-called NET-associated RNA or naRNA, might lead to a  
95 feed-forward loop of rapidly expanding NET release amongst neutrophils which might also engulf

96 additional tissue or immune cells able to respond to exRNA. We show here that naRNA drives such a  
97 self-amplifying loop not only engaging PMN but also macrophages, and keratinocytes. naRNA  
98 responsiveness was dependent on *TLR8* and *Tlr13* in human and murine myeloid immune cells,  
99 respectively. Interestingly, naRNA appears pre-complexed to LL37 as a novel composite DAMP.  
100 Notably, in mice naRNA caused considerable skin inflammation in a Tlr13-dependent manner.  
101 Additionally, in a well-established model of psoriatic skin inflammation, genetic ablation of RNA  
102 sensing strongly ameliorated skin inflammation, highlighting naRNA as a potent damage associate  
103 molecular pattern (DAMP) amplifying PMN activation and alerting tissue and other immune cells.

## 104 **Results**

### 105 **naRNA is a common component of NETs**

106 To first identify whether naRNA was a common component of NETs, we compared NETs from human  
107 PMN formed in response to the well-defined molecular agonists PMA, different complexes of LL37 with  
108 purified RNA (synthetic, as well as total fungal and bacterial RNA from *S. aureus* and *C. albicans*,  
109 respectively), nigericin (Munzer, Negro et al. 2021) and the live pathogen *C. albicans*. Confocal  
110 microscopy analysis using the well-characterized rRNA-specific antibody, Y10b (Lerner, Lerner et al.  
111 1981), revealed the presence of RNA in all corresponding NETs, independent of stimulus and whether  
112 NET formation was suicidal or not (Fig. 1A, quantified in B; control in Fig. S1A): the RNA signal was  
113 readily detectable along the web-like DNA threads in human NETs. Similar results were obtained in  
114 NETs released by murine bone marrow-derived PMN (BM-PMN, Fig. 1C; control Fig. S1B). To avoid the  
115 use of staining reagents, we also metabolically labeled primary human hematopoietic stem cells (HSCs)  
116 with 5-ethynyluridine (5-EU), a nucleotide that can be incorporated in cellular RNA but not DNA, and  
117 that is amenable to labeling by click chemistry (Presolski, Hong et al. 2011). These HSCs were then  
118 differentiated to neutrophils (Sioud 2020) and the differentiation validated by microscopy and flow  
119 cytometric analysis (Fig. S1C, D). NETs released from HSC-derived PMN could indeed be labeled with  
120 click reagents conferring a fluorescent label only when grown in 5-EU-containing medium (Fig. 1D).  
121 Moreover, the overlap between click-label and rRNA confirmed the specificity of the staining with anti-  
122 rRNA antibodies and indicated that naRNA contained rRNA but also other types of cellular RNAs. This  
123 experiment also unequivocally confirmed that upon PMN stimulation, cellular RNA is turned into a  
124 component of the NET, wherein it decorates the fine, web-like DNA structures. The localization of  
125 naRNA on DNA strands was further confirmed by high-resolution fluorescence microscopy and 3D  
126 analysis (AiryScan, Fig. 1E and Supplemental Movie S1) as well as scanning electron microscopy (SEM,  
127 Fig. 1F; controls Fig. S1E). Extraction of naRNA from PMA-induced NETs (Fig. 1G) and subsequent RNA-  
128 sequencing analysis confirmed that purified naRNA contained multiple RNA types, with noticeably  
129 more non-ribosomal RNA than the corresponding total cellular RNA of PMNs (Fig. 1H). Collectively,

130 these results indicate that naRNA is a canonical component of NETs released upon multiple stimuli  
131 from both human and murine neutrophils.

### 132 **naRNA is a potent DAMP propagating NET formation in primary PMN**

133 A primary function of NETs is host defense by trapping and killing bacteria. Therefore, we first explored  
134 if naRNA participated in this process (Brinkmann, Reichard et al. 2004). However, the antibacterial  
135 effect of NETs on live *Staphylococcus aureus* (evidenced by lower CFUs compared to resting PMNs)  
136 was similar to that of RNase-treated NETs, whereas DNase digestion reduced the drop in CFU  
137 discernibly but non-significantly (Fig. S2A). Consequently, we turned our attention to a possible role of  
138 naRNA as a DAMP, since primary PMN can respond to synthetic RNA-LL37 complexes with NET  
139 formation, and our analysis indicated that NETs also contain LL37 (Herster, Bittner et al. 2020). To  
140 prepare a naRNA-containing stimulant, PMA-induced NETs were prepared as described in Methods  
141 and the original stimulus, PMA, removed by extensive washing before harvesting. Interestingly, these  
142 ‘PMA NETs’, when applied to naïve PMN from another donor, potently induced new NETs (Fig. 2B,  
143 quantified in C, controls in Fig. S2B). Treatment with an RNase inhibitor enhanced the stimulatory  
144 effect of PMA NETs rendering a 1:500 dilution of PMA-NETs more effective than a 1:50 dilution of non-  
145 treated PMA-NETs (Fig. 2B, C, controls Fig. S2B). Interestingly, similar NET preparations from mock-  
146 treated PMNs (here referred to as ‘mock NETs’) did not stimulate NET formation under the same  
147 experimental conditions. To rule out the possibility that residual PMA in PMA NETs could be  
148 responsible for the observed stimulatory effects, RNase treatment was also performed which strongly  
149 reduced NET formation (Fig. 2D, quantified in E; controls Fig. S2C). Interestingly, DNase digestion had  
150 the same effect as RNase treatment, probably because digestions/removal of the DNA scaffold would  
151 cause a loss of associated naRNA (*cf.* Fig. 1E). This was also confirmed by rapid loss of the RNA signal  
152 (using the RNA-selective dye, SYTO RNaselect (Herster, Bittner et al. 2020) in time-lapse digestion  
153 analysis of DNA digestions (Supplemental Movie S2 and S3). Bearing in mind that PMNs do not respond  
154 to DNA or DNA-LL37 complexes (Herster, Bittner et al. 2020), the opposing effects of RNase inhibitor  
155 and RNase treatments thus clearly indicated naRNA (and not DNA) to be the relevant  
156 immunostimulatory component for NETs to drive the activation of naïve PMN. In line with our previous  
157 work showing that synthetic RNA or LL37 alone cannot trigger PMN activation (Herster, Bittner et al.  
158 2020), purified ‘naked’ naRNA isolated from PMA NETs (*cf.* Fig. 1G) was unable to activate NET  
159 formation; however, re-complexing with exogenous LL37 was sufficient to restore NET formation (Fig.  
160 2F, controls in Fig. S2D). We next investigated whether in NETs, naRNA co-localized with LL37. Strong  
161 co-localization was evident in confocal microscopy analysis (Fig. 2G) and confirmed by Pearson’s  
162 colocalization analysis (Fig. 2H). Additional line plot analysis of PMA-stimulated PMN revealed that  
163 RNA and LL37 did in fact co-localize in NETs, i.e., after extrusion (Fig. S2E). Surprisingly, in unstimulated  
164 PMNs naRNA and LL37 showed even greater colocalization (Fig. 2H), suggesting pre-association before

165 extrusion (Fig. S2E). The concept of pre-packaging also fits with the RNAseq data showing that certain  
166 RNA types are lost upon release (*cf.* Fig. 1H), probably because they are not bound to LL37. Collectively,  
167 naRNA appears to be LL37-pre-associated, and hence a 'composite' DAMP, enabling PMN activation  
168 and NET propagation.

### 169 **naRNA DAMP activity is dependent on RNA sensors TLR8/Tlr13**

170 To validate naRNA as an immunostimulatory RNA component from the receptor side, we turned to  
171 HEK293T cells which do not respond to RNA, unless transfected with plasmids encoding the human  
172 ssRNA sensors TLR7 or TLR8 (Colak, Leslie et al. 2014). NF- $\kappa$ B reporter assays revealed that TLR7 or  
173 TLR8- but not TLR9 (a human DNA sensor)-transfected HEK293T cells stimulated with PMA NETs or  
174 mock NETs showed robust NF- $\kappa$ B activity only for PMA NETs (Fig. 3A). R848 (TLR7 and TLR8 agonist)  
175 and TL8 or ssRNA+DOTAP (TLR8 agonist) served as controls. Of note, compared to its cognate agonist  
176 CpG, the DNA sensor TLR9 was only poorly activated by PMA NETs, indicating that naRNA is a superior  
177 immune stimulant compared to NET DNA in this system. Indeed, the observed response of primary  
178 PMNs (Fig. 3B, quantified in C; in Fig. S3A) could be completely blocked by the TLR8-specific inhibitor,  
179 CU-CPT9a (Zhang, Hu et al. 2018), similar to the effects of the PAD4 inhibitor, Cl-amidine (Fig. 3C and  
180 S3A). This revealed the RNA sensor TLR8 (Heil, Hemmi et al. 2004) to be the naRNA receptor in primary  
181 human PMNs. We further genetically validated the involvement of RNA sensing in naRNA-mediated  
182 NET propagation using BM-PMN from *Unc93b1*- or *Tlr13*-defective mice: whereas in *Unc93b1*-  
183 defective mice signaling of all endosomal TLRs is abrogated (Tabeta, Hoebe et al. 2006), mice lacking  
184 *Tlr13*, the murine equivalent of TLR8 (Eigenbrod and Dalpke 2015), specifically lack ssRNA sensing (Li  
185 and Chen 2012), respectively. Confocal microscopy analysis showed that WT BM-PMN responded  
186 readily to both PMA (used as control) and PMA NETs, whereas *Unc93b1* (Fig. S3B) or *Tlr13* KO PMN  
187 (Fig. 3D, quantified in E) only responded to the TLR-independent PMA control but not PMA NETs. This  
188 receptor analysis unequivocally confirmed naRNA to be a primary immune stimulant in NETs.

### 189 **PMN-derived naRNA triggers broader immune cell and keratinocyte activation**

190 Given the potent effect of naRNA on naïve PMNs (*cf.* Fig. 3B-E) and the ability of human macrophages  
191 to sense RNA via TLR8 (Ishii, Funami et al. 2014), we hypothesized that naRNA might also directly  
192 activate macrophages, which are rapidly recruited at the sites of PMN activation in peripheral tissues  
193 (Mahdavian Delavary, van der Veer et al. 2011), contributing to an inflammatory process *in vivo*. We  
194 thus assessed the effects of naRNA on genetically modified macrophage-like cell lines: BlaER1  
195 macrophages (Vierbuchen, Bang et al. 2017) responded to PMA NETs but not mock NETs with IL-8  
196 release, and this was TLR8-dependent as evidenced by comparisons of WT and *TLR8*-edited BlaER1  
197 cells (Fig. 3F). Use of a naRNA-stabilizing RNase inhibitor during NET preparation (*cf.* Fig. 2B) drastically  
198 increased the potency of PMA NETs on these macrophages. Additionally, TLR8 and TLR7-edited THP-1

199 macrophage-like cells (Coch, Hommertgen et al. 2019) responded to PMA NETs with lower relative IL-  
200 8 release than WT THP-1 cells (Fig. S4A), confirming RNA as the active agent in monocyte/macrophage  
201 activation. Human peripheral blood mononuclear cells (PBMCs) were also stimulated with different  
202 NET preparations. RNA-stabilized PMA NETs consistently elicited higher TNF, IL-6 and IL-8 levels than  
203 non-stabilized PMA- or mock NETs (Fig. S4B-D). However, this effect was not sensitive to the TLR8  
204 inhibitor Cu-CPT9a, which is consistent with the ability of TLR7 to also sense naRNA (*cf.* Fig. 3A) and  
205 possibly due to a mixture of cells being present. Further analysis revealed that the natural killer (NK)  
206 cell line NK-92 MI showed low IFN $\gamma$  release in response to RNA-stabilized PMA NETs (Fig. S4E).  
207 Collectively, our results show that the RNA component of NETs, naRNA, can engage not only bystander  
208 neutrophils in a feed-forward inflammatory response but also other myeloid  
209 (monocytes/macrophages) and lymphoid (NK cells) cellular innate immunity. To investigate whether  
210 non-hematopoietic cells with immune functions, e.g. tissue cells like keratinocytes, could also respond  
211 to RNA-stabilized PMA NETs, N/TERT-1 keratinocytes (Dickson, Hahn et al. 2000) in monolayers were  
212 exposed to PMA-NETs (Fig. 3G). This triggered a dose-dependent IL-8 release comparable to synthetic  
213 RNA+LL37, especially under RNA stabilization by RNase inhibitors. Similar results were obtained using  
214 primary normal human epidermal keratinocyte (NHEK) monolayers (Fig. 3H). Furthermore, in an 'in  
215 vivo'-like human skin equivalent 3D model in which natural keratinocyte differentiation was  
216 recapitulated by NHEK cells (Bitschar, Sauer et al. 2019)), PMA but not mock NETs significantly induced  
217 *IL8* mRNA and protein (Fig. 3I, J). Thus, naRNA can not only activate primary neutrophils in vitro but  
218 also trigger broad immune activation in other immune and tissue cells/equivalents.

### 219 **naRNA displays DAMP activity in vivo in dependence on RNA sensing**

220 Finally, to gain an insight into whether naRNA could trigger inflammation in vivo in an RNA receptor-  
221 dependent manner, we intradermally injected RNase inhibitor-stabilized mock or PMA NETs in the ears  
222 of C57BL6 mice. RNA-stabilized PMA NETs were almost as potent to induce ear swelling as synthetic  
223 RNA+LL37 (Fig. 4A), but even non-stabilized PMA NETs induced a response significantly higher than  
224 mock NETs. The same stimulants were also injected into the ear of *LysM<sup>EGFP/+</sup>* mice, in which myeloid  
225 cells are GFP-positive, thus enabling in vivo monitoring of cellular influx during skin inflammation. Here,  
226 RNA-stabilized PMA NETs elicited even greater cellular influx than synthetic RNA+LL37 and mock NETs  
227 (Fig. 4B). Importantly, a comparison of WT and *Tlr13*-deficient animals showed that the ear swelling  
228 reaction resulting in vivo was naRNA-dependent because RNA-stabilized PMA-NETs were significantly  
229 less effective in *Tlr13*-deficient animals (Fig. 4C).

### 230 **Self-RNA recognition contributes to progressive skin inflammation in experimental psoriasis**

231 Finally, we sought to explore if naRNA was relevant in an animal disease model. The most frequently  
232 used murine model of psoriasis uses the TLR7 ligand imiquimod (IMQ) to trigger increasing skin



233 inflammation characterized by epidermal thickening and immune cell infiltration. We previously  
234 showed that IMQ treatment also leads to the occurrence of NETs in the tissue (Herster, Bittner et al.  
235 2020). We therefore speculated that naRNA might be involved in disease progression, a hypothesis  
236 that could be probed by genetically ablating naRNA sensing and comparing WT and *Tlr13* KO mice.  
237 Although in the early induction phase, WT and *Tlr13* KO animals showed a similar increase in ear  
238 thickness, the groups diverged from day 3 onwards, after which *Tlr13*-deficient animals were  
239 significantly protected from skin inflammation compared to WT mice (Fig. 4D). The most plausible  
240 explanation is that IMQ-initiated NET formation (Herster, Bittner et al. 2020) amplifies skin  
241 inflammation in WT animals via naRNA, whereas this is prevented in *Tlr13* KO animals. This shows that  
242 naRNA can significantly contribute to inflammation in a well-established disease model and can act as  
243 a potent inflammation-amplifying endogenous DAMP.

## 244 **Discussion**

245 At first sight, it may not seem surprising that the release of NETs, a process that churns up the most  
246 critical compartment of a cell, e.g., the nucleus, also inevitably leads to the release of another primary  
247 cellular biomolecule, namely RNA. However, independently of whether the process is regulated or not,  
248 the release of RNA by NETting PMN appears to have physiological importance as we have  
249 demonstrated here. Rather than acting directly in antimicrobial defense (*cf.* Fig. S2A), naRNA appears  
250 to be an LL37-precomplexed DAMP of PMN origin that can be released in the NETting process and then  
251 activates both PMN and other immune and tissue cells in an RNA sensor-dependent manner (Fig. S5).  
252 Several further findings warrant further discussion:

253 Firstly, our data revise previous concepts of self-RNA and LL37 in the ‘breaking’ of innate immune  
254 tolerance in psoriasis and the physiological role of NETs in general: We found that only when naRNA is  
255 complexed with LL37, it gains stimulatory properties on neutrophils (*cf.* Fig. 2F), comparable to other  
256 RNAs tested so far. Based on earlier work (Herster, Bittner et al. 2020) (Kulkarni, O’Neill et al. 2021),  
257 LL37 thus may function as a physiological ‘transfection reagent’ of naRNA mediating its uptake into  
258 immune cells, but possibly also shielding it from RNase degradation. LL37 thus moonlights as an  
259 immunomodulatory peptide rather than only possessing antimicrobial activities. However, RNA and  
260 LL37 do not appear to aggregate and co-localize ‘accidentally’ in NETs: quite unexpectedly, they were  
261 rather found in even greater co-localization in resting neutrophils, indicating a kind of ‘pre-association’  
262 and intracellular storage of a pre-defined naRNA-LL37 ‘composite’ DAMP before extrusion during NET  
263 formation. Importantly, the identification of such pre-association challenges existing concepts of LL37-  
264 RNA complexes as ‘accidentally assembled’ tolerance breakers in certain diseases (Ganguly, Chamilos  
265 et al. 2009). Rather, it suggests naRNA-LL37 complexes act as ‘purposefully pre-associated’ DAMPs that  
266 arm neutrophils. It will be interesting to study the process for pre-association for this first ‘composite

267 DAMP' and elucidate the precise nature of the RNAs assembled with LL37 in the future. Intracellular  
268 (rather than accidental/extracellular) pre-association points to a specific role of the naRNA-LL37 DAMP  
269 in NET biology. Beyond simply amplifying inflammation, we speculate that the physiological relevance  
270 of deploying this composite DAMP upon NET formation could be to tag fresh NETs with a timed  
271 molecular beacon: Freshly extruded NETs decorated with the naRNA-LL37 DAMP would likely highlight  
272 the lingering presence of a pathogenic microorganism or acute tissue damage to other cells not directly  
273 engaged by the threat. The naRNA-LL37 DAMP would thus label 'fresh NETs' as 'requiring attention'  
274 and triggering further immune activation. Over time, whilst the DNA-related structural and  
275 antimicrobial properties of NETs may remain longer, inevitable RNA degradation would lead to  
276 deactivation of the composite DAMP, rendering 'old NETs' less immunostimulatory. Further work  
277 outside the scope of the present study may explore such a role of naRNA as time-restricted molecular  
278 label for NETs.

279 Moreover, our data pertain to the origin and effects of 'extracellular RNA' (exRNA). exRNA is a generic  
280 term to indicate a heterogeneous group of RNA molecules which are actively or passively released  
281 during sterile inflammation or infectious processes. exRNA can be released in a 'free' state, bound to  
282 proteins or phospholipids, in association with extracellular vesicles (EVs) or apoptotic bodies  
283 (Preissner, Fischer et al. 2020). In all these forms exRNA may function as DAMP but also as e.g.,  
284 procoagulant or regenerative factor (Preissner, Fischer et al. 2020). Our data identify naRNA as the first  
285 type of exRNA for which a clear physiological origin (NETs) is provided. We speculate that our findings  
286 will help trace multiple descriptions of exRNA on the one side, to neutrophil ETs on the other. For  
287 example, exRNA has emerged as disease-relevant in atherosclerosis, where it was described to act as  
288 a proinflammatory mediator enhancing the recruitment of leukocytes to the site of atherosclerotic  
289 lesions as shown in a mouse model of accelerated atherosclerosis (Simsekylmaz, Cabrera-Fuentes et  
290 al. 2014). At the same time, NETs have been ascribed a role in amplifying sterile inflammatory  
291 responses in an independent mouse model of atherosclerosis by priming macrophages (Warnatsch,  
292 Ioannou et al. 2015). However, never have these two independent strains of research been connected.  
293 By showing NETs to release naRNA, a type of exRNA, our work connects both lines of enquiry. Likewise,  
294 for rheumatoid arthritis (RA), our work makes a plausible link between exRNA in synovial fluid  
295 contributing to joint inflammation (Neumann, Hasseli et al. 2018), the emerging role of NETs in RA  
296 (Song, Ye et al. 2020) and even a hitherto enigmatic but therapeutically relevant role of TLR8 (Sacre,  
297 Lo et al. 2008, Sacre, Lo et al. 2016). We suspect similar links to emerge for cardiovascular diseases and  
298 cancer if the role of naRNA is thoroughly assessed. Furthermore, the broad sensitivity of immune and  
299 tissue cells to naRNA observed by us makes sense of how exRNA may act pathophysiologically.

300 Although we believe PMN to be the primary trap forming human leukocyte population and hence  
301 naRNA the most significant "trap-associated RNA", it will be interesting to explore whether mast cell

302 (MCETs) (Mollerherm, von Kockritz-Blickwede et al. 2016) or macrophage extracellular traps (METs)  
303 (Doster, Rogers et al. 2018) contain RNA. However, unlike PMN, the latter immune cells are not primary  
304 sources of LL37 (Sorensen, Arnljots et al. 1997), so that RNA associated with MCETs or METs would be  
305 of lesser physiological relevance as a DAMP than naRNA due to a lack of LL37. Therefore, translational  
306 approaches, e.g. to restrict trap-RNA mediated amplification of inflammation, should probably center  
307 on PMN-derived naRNA. The use of PAD4 inhibitors has already been investigated in animal models to  
308 treat cancer or atherosclerotic lesions (Li, Lin et al. 2020) (Knight, Luo et al. 2014) and would represent  
309 one potential way of eliminating NETs and hence naRNA-mediated inflammation. However, this would  
310 also prevent the effects of NETs that are beneficial for host defense (e.g. physical trapping via DNA and  
311 antimicrobial enzymatic activities) and may render treated patients vulnerable to infections. From a  
312 translational perspective, our in vivo data indicate that blockade of RNA sensing might be more  
313 advantageous, restricting only naRNA mediated responses. Although probably not applicable to  
314 patients, it is underscored by evidence that neuroinflammation upon subarachnoid hemorrhage, which  
315 is characterized by a NET pathology, is strongly ameliorated by RNase treatment in vivo (Fruh, Tielking  
316 et al. 2021). More applicable to patients may be the targeting of TLR8 by small molecular antagonists  
317 (Vlach, Bender et al. 2021) or inhibitory oligonucleotides, which are able to block PMN responsiveness  
318 to synthetic RNA in vitro (Herster, Bittner et al. 2020). Exciting is thus the observed efficacy of TLR  
319 inhibitory oligoribonucleotides in a psoriasis mouse model (Jiang, Zhu et al. 2013) and even a first  
320 clinical trial in psoriasis patients (Balak, van Doorn et al. 2017). We could imagine the blockade of  
321 naRNA effects via TLRs highlighted here to emerge as an effective novel strategy to target multiple  
322 exRNA or NET-related inflammatory responses.

## 323 **Figure legends**

### 324 **Fig. 1: naRNA is a canonical component of NETs.**

325 **(A, B)** Confocal microscopy of primary human PMNs stimulated as indicated for 3 h and stained for  
326 naRNA (anti-rRNA Y10b, magenta) and DNA (Hoechst 33342, white; n = 3, scale bar: 10  $\mu$ m, arrowheads  
327 point to selected NET strands; representative images in **A**) were quantified in **B** (each dot represents  
328 one image, \*p<0.05 according to one-way ANOVA). **(C)** Confocal microscopy of primary murine BM-  
329 PMNs stimulated as indicated for 16 h and stained as in **A** (n = 3, representative images, scale bar: 10  
330  $\mu$ m). **(D)** Confocal microscopy of primary human stem cells differentiated *in vitro* with/without 100  $\mu$ M  
331 5-ethynyl uridine (5-EU), click-labeled with a fluorescent dye (yellow, total RNA), anti-rRNA and  
332 Hoechst 33342 as in **A** (n = 3, representative images, scale bar: 10  $\mu$ m, 2  $\mu$ m in cropped image). **(E)** as  
333 in **A** but showing 3D image reconstruction of z-stacks (n = 3, representative images, scale bar: 10  $\mu$ m).  
334 **(F)** Scanning electron microscopy of human primary PMNs treated as indicated and using anti-rRNA  
335 primary and immunogold (white arrow)-labeled secondary antibodies and silver enhancement (n = 3,  
336 representative images, scale bars as indicated; the two rightmost images show composite images with  
337 signals from secondary electron and backscattered electron detectors for topography and additional  
338 material information, respectively). **(G)** Agilent TapeStation quantification of naRNA isolated from  
339 mock or PMA NETs (from n = 4-6 donors, combined data, mean+SD, each dot represents one biological  
340 replicate/donor, \*p<0.05 according to Mann-Whitney test). **(H)** RNAseq of PMA NET naRNA (n = 4) and  
341 whole PMN RNA (n = 1) (combined data).

### 342 **Fig. 2. naRNA is a DAMP driving NET propagation in human PMN**

343 **(A)** Workflow for NET content preparation from one donor and transfer to naïve human primary PMN  
344 from a second donor. **(B)** Confocal microscopy of primary human PMNs stimulated with NET content  
345 harvested with/without RNase inhibitor and diluted 1:50 or 1:500, and then stained for NETs/DNA  
346 (Hoechst 33342, n = 9, representative images, scale bar: 10  $\mu$ m). **(C)** Quantification of **B** using DNA  
347 (Hoechst 33342) signal to quantify NET formation (n = 3, combined data, mean+SD, each dot  
348 represents one image, \*p<0.05 according to one-way ANOVA). **(D)** as in **B** but with/without pre-  
349 digestion of NET content with RNase A or DNase I (n = 3, representative images; scale bar: 10  $\mu$ m). **(E)**  
350 Quantification of **D** (n = 3, combined data, mean+SD, each dot represents the number of NET-positive  
351 tiles in one image quantified from three images/condition, \*p<0.05 according to one-way ANOVA). **(F)**  
352 As in **B** but using purified naRNA (*cf.* Fig. 1G) alone or in complex with exogenously added LL37 (n = 3,  
353 representative images; scale bar: 10  $\mu$ m). **(G)** Confocal microscopy of primary human PMNs stimulated  
354 as indicated for 3 h and stained for naRNA (anti-rRNA Y10b, magenta), LL37 (anti-hLL37-DyLight550,  
355 yellow), and DNA (Hoechst 33342, white; n = 3, representative images, scale bar 10  $\mu$ m). **(H)** Pearson's

356 correlation coefficient (colocalization) analysis of **G** (n = 3, combined data, mean+SD, each dot  
357 represents one image, three images/condition, \*p<0.05 according to one-way ANOVA).

358 **Fig. 3. naRNA activity depends on RNA sensors**

359 **(A)** NF- $\kappa$ B dual luciferase assay in HEK293T cell transiently transfected and stimulated as indicated (eV  
360 = empty vector, n=3-5, combined data, mean+SD, \*p<0.05 according to one-way ANOVA). **(B)** Confocal  
361 microscopy of human primary PMNs stimulated as indicated in the presence or absence of CU-CPT9a  
362 (100 nM) or Cl-amidine (200  $\mu$ M, not shown) and stained for NETs/DNA (Hoechst 33342, white, n = 3,  
363 representative images, scale bar: 10  $\mu$ m). **(C)** Quantification of **B** using DNA (Hoechst 33342) signal to  
364 quantify NET formation (n = 3, combined data, mean+SD, each dot represents the number of NET-  
365 positive tiles in one image, three images/condition, \*p<0.05 according to non-parametric one-way  
366 ANOVA). **(D)** Confocal microscopy analysis of primary C57BL/6 WT or *Tlr13*<sup>-/-</sup> murine BM-PMNs  
367 stimulated as indicated and stained for NETs/DNA (Hoechst 33342, white, n = 3, representative images,  
368 scale bar: 10  $\mu$ m). **(E)** Quantification of **D** as in **C** (n = 3, \*p<0.05 according to one-way ANOVA). **(F)**  
369 Triplicate IL-8 ELISA from WT, *TLR8*<sup>-/-</sup> and *UNC93B1*<sup>-/-</sup> BlaER1 macrophage-like cells stimulated as  
370 indicated for 18 h (n = 2-3, combined data, mean+SD, each dot represents one biological replicate,  
371 \*p<0.05 according to one-way ANOVA). **(G)** Triplicate IL-8 ELISA from N/TERT-1 keratinocytes  
372 stimulated as indicated for 24 h (n = 3, combined data, mean+SD, each dot represents one biological  
373 replicate, \*p<0.05 according to one-way ANOVA). **(H)** as in **G** but with primary normal human  
374 epidermal keratinocytes (NHEK) (n = 3, combined data, mean+SD, each dot represents one biological  
375 replicate, \*p<0.05 according to one-way ANOVA). **(I, J)** Triplicate relative (to unstimulated) *IL8* mRNA  
376 qPCR or IL-8 ELISA from NHEK 3D human skin equivalent constructs stimulated as indicated for 24 h (n  
377 = 2, representative of one biological replicate is shown, mean+SD, each dot represents one technical  
378 replicate, \*p<0.05 according to one-way ANOVA).

379 **Fig. 4. naRNA is a driver of NET-associated *in vivo* inflammation**

380 **(A)** Ear thickness quantified daily in WT C57BL6 mice injected intradermally *in vivo* on day 0 as indicated  
381 (n = 5 per group, combined data, mean+SD, \*p<0.05 according to two-way ANOVA). **(B)** Fluorescence  
382 imaging monitored hourly in *LysM*<sup>EGFP/+</sup> mice injected intradermally *in vivo* at t=0 as indicated (n = 10  
383 per group, combined data, mean+SD, \*p<0.05 according to two-way ANOVA). **(C)** As in **A** but also using  
384 *Tlr13*<sup>-/-</sup> mice (n = 7, combined data, mean+SD, \*p<0.05 according to two-way ANOVA). **(D)** As in **C** but  
385 instead of intradermal injection with topical imiquimod application on day 0-4 (C57BL/6 n = 5, *Tlr13*<sup>-/-</sup>  
386 n = 3, combined data, mean+SD, \*p<0.05 according to two-way ANOVA).

387 **Fig. S1. Controls of IF microscopy, stem cell-derived PMNs, and electron microscopy**

388 **(A)** Confocal microscopy of unstimulated primary human PMNs (control to Fig. 1A) after 3 h and stained  
389 for naRNA (anti-rRNA Y10b, magenta) and DNA (Hoechst 33342, white; n = 3, representative images,

390 scale bar: 10  $\mu$ m). **(B)** Confocal microscopy of unstimulated primary murine BM-PMNs (control to Fig.  
391 1C) after 16 h and stained as in **A** (n = 3, representative images, scale bar: 10  $\mu$ m). **(C)** Brightfield  
392 microscopy analysis of cytospun control primary human stem cell-derived PMNs (control to Fig. 1D)  
393 differentiated *in vitro* with/without 100  $\mu$ M 5-Ethynyluridine (5-EU, n = 3, representative images, scale  
394 bar: 20  $\mu$ m). **(D)** FACS analysis for cells shown in **C** and Fig. 1D (n=3, representative data). **(E)** Scanning  
395 electron microscopy of PMA-treated human primary PMNs showing only secondary antibody staining  
396 (no primary antibody) control of Fig. 1F (n = 1, representative data; the image on the right is a  
397 composite image with signals from secondary electron and backscattered electron detectors for  
398 topography and additional material information, respectively).

399 **Fig. S2. Antibacterial effect of NETs on live *S. aureus*, controls of IF microscopy and line plot**  
400 **analysis of naRNA and LL37**

401 **(A)** Extracellular bactericidal activity of human PMN/NETs after infection with *S. aureus* and treatment  
402 with RNase A and DNase I during or after formation of PMA-induced NETs (n = 8, combined data,  
403 mean+SD, \*p<0.05 according to one-way ANOVA). **(B)** Confocal microscopy of unstimulated or PMA-  
404 stimulated primary human PMNs (control to Fig. 2B) after 3 h, stained DNA (Hoechst 33342, white; n  
405 = 9, representative images; scale bar: 10  $\mu$ m). **(C)** as in **B** but controls of Fig. 2D (n = 3). **(D)** as in **B** but  
406 controls of Fig. 2F (n = 3). **(E)** Confocal microscopy of primary human PMNs stimulated as indicated for  
407 3 h and stained for naRNA (anti-rRNA Y10b, magenta), LL37 (anti-hLL37-DyLight550, yellow) and DNA  
408 (Hoechst 33342, white; n = 3, representative images, scale bar 10  $\mu$ m). The line plot analysis of LL37,  
409 RNA and DNA staining was performed using ZenBlue3 software (n=2). Two different line plots from the  
410 same representative image are shown.

411 **Fig. S3. Inhibition of PAD4 in human PMNs during NET formation assay and *Unc93b1*<sup>-/-</sup> BM-PMN**  
412 **stimulation with human NETs**

413 **(A)** Confocal microscopy of stimulated primary human PMNs after 3 h and stained for DNA (Hoechst  
414 33342, white) in the presence or absence of the PAD4-inhibitor Cl-amidine (200  $\mu$ M, n = 3,  
415 representative images; scale bar 10  $\mu$ m). **(B)** Confocal microscopy of unstimulated primary C57BL/6  
416 WT or *Unc93b1*<sup>-/-</sup> murine BM-PMNs stimulated as indicated for 16 h as in **A** (n = 3 WT, n = 1 *Unc93b1*<sup>-/-</sup>  
417 , representative images, scale bar: 10  $\mu$ m).

418 **Fig. S4. Immune responses of PBMCs, macrophages, and NK-cells to NETs and in vivo fluorescence**  
419 **imaging**

420 **(A)** Triplicate IL-8 ELISA from WT, *TLR8*<sup>-/-</sup> and *TLR7*<sup>-/-</sup> THP-1 cells stimulated as indicated for 18 h,  
421 normalized to PMA+ionomycin control (n = 4, combined data, mean+SD, each dot represents one  
422 biological replicate, \*p<0.05 according to one-way ANOVA). **(B-D)** Triplicate ELISA for TNF **(A**, n = 4), IL-  
423 6 **(B**, n = 3), and IL-8 **(C**, n = 3) from primary human PBMCs stimulated as indicated with/without CU-  
424 CPT9a for 24 h (combined data, mean+SD, each dot represents one biological replicate, \*p<0.05

425 according to one-way ANOVA). (E) Triplicate IFN- $\gamma$  ELISA from NK-92 MI cells stimulated as indicated  
426 for 24 h (n = 3, combined data, mean+SD, each dot represents one biological replicate, \*p<0.05  
427 according to one-way ANOVA).

#### 428 **Fig. S5. Graphical abstract**

#### 429 **Supplemental movie S1: 3D reconstruction of NET DNA network decorated with naRNA**

430 Confocal microscopy of primary human PMNs stimulated with PMA for 3 h, stained for naRNA (anti-  
431 rRNA Y10b, magenta) and DNA (Hoechst 33342, white; n = 3) and 3D analysis and animation were  
432 performed.

#### 433 **Supplemental movie S2: Digest of naRNA in PMA-induced NETs**

434 Confocal live microscopy of RNase digestion of NETs obtained from primary human PMNs stimulated  
435 with PMA for 3 h, stained for naRNA (SYTO RNaselect, magenta) and DNA (Hoechst 33342, white; n =  
436 3). RNase A was added, and live cell imaging was immediately started (n = 3, scale bar 20  $\mu$ m).

#### 437 **Supplemental movie S3: DNase degrades not only DNA but also naRNA in NETs**

438 Confocal live microscopy of DNase digestion of NETs obtained from primary human PMNs stimulated  
439 with PMA for 3 h, stained for naRNA (SYTO RNaselect, magenta) and DNA (Hoechst 33342, white; n =  
440 3). DNase I was added, and live cell imaging was immediately started (n = 3, scale bar 20  $\mu$ m).

441

## 442 **References**

- 443 Altincicek, B., S. Stotzel, M. Wygrecka, K. T. Preissner and A. Vilcinskas (2008). "Host-derived  
444 extracellular nucleic acids enhance innate immune responses, induce coagulation, and prolong  
445 survival upon infection in insects." *J Immunol* **181**(4): 2705-2712.
- 446 Balak, D. M., M. B. van Doorn, R. D. Arbeit, R. Rijneveld, E. Klaassen, T. Sullivan, J. Brevard, H. B. Thio,  
447 E. P. Prens, J. Burggraaf and R. Rissmann (2017). "IMO-8400, a toll-like receptor 7, 8, and 9  
448 antagonist, demonstrates clinical activity in a phase 2a, randomized, placebo-controlled trial in  
449 patients with moderate-to-severe plaque psoriasis." *Clin Immunol* **174**: 63-72.
- 450 Bitschar, K., B. Sauer, J. Focken, H. Dehmer, S. Moos, M. Konnerth, N. A. Schilling, S. Grond, H.  
451 Kalbacher, F. C. Kurschus, F. Gotz, B. Krismer, A. Peschel and B. Schitteck (2019). "Lugdunin amplifies  
452 innate immune responses in the skin in synergy with host- and microbiota-derived factors." *Nat*  
453 *Commun* **10**(1): 2730.
- 454 Bitschar, K., L. Staudenmaier, L. Klink, J. Focken, B. Sauer, B. Fehrenbacher, F. Herster, Z. Bittner, L.  
455 Bleul, M. Schaller, C. Wolz, A. N. R. Weber, A. Peschel and B. Schitteck (2020). "Staphylococcus aureus  
456 Skin Colonization Is Enhanced by the Interaction of Neutrophil Extracellular Traps with  
457 Keratinocytes." *J Invest Dermatol* **140**(5): 1054-1065 e1054.
- 458 Boeltz, S., P. Amini, H. J. Anders, F. Andrade, R. Bilyy, S. Chatfield, I. Cichon, D. M. Clancy, J. Desai, T.  
459 Dumych, N. Dwivedi, R. A. Gordon, J. Hahn, A. Hidalgo, M. H. Hoffmann, M. J. Kaplan, J. S. Knight, E.  
460 Kolaczowska, P. Kubes, M. Leppkes, A. A. Manfredi, S. J. Martin, C. Maueroeder, N. Maugeri, I.  
461 Mitroulis, L. E. Munoz, D. Nakazawa, I. Neeli, V. Nizet, E. Pieterse, M. Z. Radic, C. Reinwald, K. Ritis, P.  
462 Rovere-Querini, M. Santocki, C. Schauer, G. Schett, M. J. Shlomchik, H. U. Simon, P. Skendros, D.  
463 Stojkov, P. Vandenabeele, T. V. Berghe, J. van der Vlag, L. Vitkov, M. von Kockritz-Blickwede, S.

464 Yousefi, A. Zarbock and M. Herrmann (2019). "To NET or not to NET:current opinions and state of the  
465 science regarding the formation of neutrophil extracellular traps." *Cell Death Differ* **26**(3): 395-408.  
466 Brinkmann, V., U. Reichard, C. Goosmann, B. Fauler, Y. Uhlemann, D. S. Weiss, Y. Weinrauch and A.  
467 Zychlinsky (2004). "Neutrophil extracellular traps kill bacteria." *Science* **303**(5663): 1532-1535.  
468 Chang, T.-H., Y. C. Gloria, M. J. Hellmann, C. L. Greve, D. L. Roy, T. Roger, L. Kasper, B. Hube, S. Pusch,  
469 N. Gow, M. Sørliie, A. Tøndervik, B. M. Moerschbacher and A. N. R. Weber (2022). "Transkingdom  
470 mechanism of MAMP generation by chitotriosidase (CHIT1) feeds oligomeric chitin from fungal  
471 pathogens and allergens into TLR2-mediated innate immune sensing." *bioRxiv*:  
472 2022.2002.2017.479713.  
473 Coch, C., B. Hommertgen, T. Zillinger, J. Dassler-Plenker, B. Putschli, M. Nastaly, B. M. Kummerer, J. F.  
474 Scheunemann, B. Schumak, S. Specht, M. Schlee, W. Barchet, A. Hoerauf, E. Bartok and G. Hartmann  
475 (2019). "Human TLR8 Senses RNA From Plasmodium falciparum-Infected Red Blood Cells Which Is  
476 Uniquely Required for the IFN-gamma Response in NK Cells." *Front Immunol* **10**: 371.  
477 Colak, E., A. Leslie, K. Zausmer, E. Khatamzas, A. V. Kubarenko, T. Pichulik, S. N. Klimosch, A. Mayer,  
478 O. Siggs, A. Hector, R. Fischer, B. Klessner, A. Rautanen, M. Frank, A. V. Hill, B. Manoury, B. Beutler, D.  
479 Hartl, A. Simmons and A. N. Weber (2014). "RNA and imidazoquinolines are sensed by distinct TLR7/8  
480 ectodomain sites resulting in functionally disparate signaling events." *J Immunol* **192**(12): 5963-5973.  
481 Dickson, M. A., W. C. Hahn, Y. Ino, V. Ronfard, J. Y. Wu, R. A. Weinberg, D. N. Louis, F. P. Li and J. G.  
482 Rheinwald (2000). "Human keratinocytes that express hTERT and also bypass a p16(INK4a)-enforced  
483 mechanism that limits life span become immortal yet retain normal growth and differentiation  
484 characteristics." *Mol Cell Biol* **20**(4): 1436-1447.  
485 Doster, R. S., L. M. Rogers, J. A. Gaddy and D. M. Aronoff (2018). "Macrophage Extracellular Traps: A  
486 Scoping Review." *J Innate Immun* **10**(1): 3-13.  
487 Eigenbrod, T. and A. H. Dalpke (2015). "Bacterial RNA: An Underestimated Stimulus for Innate  
488 Immune Responses." *J Immunol* **195**(2): 411-418.  
489 Faust, N., F. Varas, L. M. Kelly, S. Heck and T. Graf (2000). "Insertion of enhanced green fluorescent  
490 protein into the lysozyme gene creates mice with green fluorescent granulocytes and macrophages."  
491 *Blood* **96**(2): 719-726.  
492 Fruh, A., K. Tielking, F. Schoknecht, S. Liu, U. C. Schneider, S. Fischer, P. Vajkoczy and R. Xu (2021).  
493 "RNase A Inhibits Formation of Neutrophil Extracellular Traps in Subarachnoid Hemorrhage." *Front*  
494 *Physiol* **12**: 724611.  
495 Ganguly, D., G. Chamilos, R. Lande, J. Gregorio, S. Meller, V. Facchinetti, B. Homey, F. J. Barrat, T. Zal  
496 and M. Gilliet (2009). "Self-RNA-antimicrobial peptide complexes activate human dendritic cells  
497 through TLR7 and TLR8." *J Exp Med* **206**(9): 1983-1994.  
498 Gilliet, M., C. Conrad, M. Geiges, A. Cozzio, W. Thurlimann, G. Burg, F. O. Nestle and R. Dummer  
499 (2004). "Psoriasis triggered by toll-like receptor 7 agonist imiquimod in the presence of dermal  
500 plasmacytoid dendritic cell precursors." *Arch Dermatol* **140**(12): 1490-1495.  
501 Heil, F., H. Hemmi, H. Hochrein, F. Ampenberger, C. Kirschning, S. Akira, G. Lipford, H. Wagner and S.  
502 Bauer (2004). "Species-specific recognition of single-stranded RNA via toll-like receptor 7 and 8."  
503 *Science* **303**(5663): 1526-1529.  
504 Herster, F., Z. Bittner, N. K. Archer, S. Dickhofer, D. Eisel, T. Eigenbrod, T. Knorpp, N. Schneiderhan-  
505 Marra, M. W. Loffler, H. Kalbacher, T. Vierbuchen, H. Heine, L. S. Miller, D. Hartl, L. Freund, K.  
506 Schakel, M. Heister, K. Ghoreschi and A. N. R. Weber (2020). "Neutrophil extracellular trap-associated  
507 RNA and LL37 enable self-amplifying inflammation in psoriasis." *Nat Commun* **11**(1): 105.  
508 Ishii, N., K. Funami, M. Tatematsu, T. Seya and M. Matsumoto (2014). "Endosomal localization of  
509 TLR8 confers distinctive proteolytic processing on human myeloid cells." *J Immunol* **193**(10): 5118-  
510 5128.  
511 Jiang, W., F. G. Zhu, L. Bhagat, D. Yu, J. X. Tang, E. R. Kandimalla, N. La Monica and S. Agrawal (2013).  
512 "A Toll-like receptor 7, 8, and 9 antagonist inhibits Th1 and Th17 responses and inflammasome  
513 activation in a model of IL-23-induced psoriasis." *J Invest Dermatol* **133**(7): 1777-1784.  
514 Knight, J. S., W. Luo, A. A. O'Dell, S. Yalavarthi, W. Zhao, V. Subramanian, C. Guo, R. C. Grenn, P. R.  
515 Thompson, D. T. Eitzman and M. J. Kaplan (2014). "Peptidylarginine deiminase inhibition reduces



516 vascular damage and modulates innate immune responses in murine models of atherosclerosis." Circ  
517 Res **114**(6): 947-956.

518 Kruger, P., M. Saffarzadeh, A. N. Weber, N. Rieber, M. Radsak, H. von Bernuth, C. Benarafa, D. Roos,  
519 J. Skokowa and D. Hartl (2015). "Neutrophils: Between host defence, immune modulation, and tissue  
520 injury." PLoS Pathog **11**(3): e1004651.

521 Kulkarni, N. N., A. M. O'Neill, T. Dokoshi, E. W. C. Luo, G. C. L. Wong and R. L. Gallo (2021). "Sequence  
522 determinants in the cathelicidin LL-37 that promote inflammation via presentation of RNA to  
523 scavenger receptors." J Biol Chem **297**(1): 100828.

524 Lande, R., J. Gregorio, V. Facchinetti, B. Chatterjee, Y. H. Wang, B. Homey, W. Cao, Y. H. Wang, B. Su,  
525 F. O. Nestle, T. Zal, I. Mellman, J. M. Schroder, Y. J. Liu and M. Gilliet (2007). "Plasmacytoid dendritic  
526 cells sense self-DNA coupled with antimicrobial peptide." Nature **449**(7162): 564-569.

527 Lerner, E. A., M. R. Lerner, C. A. Janeway, Jr. and J. A. Steitz (1981). "Monoclonal antibodies to nucleic  
528 acid-containing cellular constituents: probes for molecular biology and autoimmune disease." Proc  
529 Natl Acad Sci U S A **78**(5): 2737-2741.

530 Li, M., C. Lin, H. Deng, J. Strnad, L. Bernabei, D. T. Vogl, J. J. Burke and Y. Nefedova (2020). "A Novel  
531 Peptidylarginine Deiminase 4 (PAD4) Inhibitor BMS-P5 Blocks Formation of Neutrophil Extracellular  
532 Traps and Delays Progression of Multiple Myeloma." Mol Cancer Ther **19**(7): 1530-1538.

533 Li, X. D. and Z. J. Chen (2012). "Sequence specific detection of bacterial 23S ribosomal RNA by TLR13." Elife  
534 **1**: e00102.

535 Mahdavian Delavary, B., W. M. van der Veer, M. van Egmond, F. B. Niessen and R. H. Beelen (2011).  
536 "Macrophages in skin injury and repair." Immunobiology **216**(7): 753-762.

537 Mollerherm, H., M. von Kockritz-Blickwede and K. Branitzki-Heinemann (2016). "Antimicrobial  
538 Activity of Mast Cells: Role and Relevance of Extracellular DNA Traps." Front Immunol **7**: 265.

539 Munzer, P., R. Negro, S. Fukui, L. di Meglio, K. Aymonnier, L. Chu, D. Cherpokova, S. Gutch, N. Sorvillo,  
540 L. Shi, V. G. Magupalli, A. N. R. Weber, R. E. Scharf, C. M. Waterman, H. Wu and D. D. Wagner (2021).  
541 "NLRP3 Inflammasome Assembly in Neutrophils Is Supported by PAD4 and Promotes NETosis Under  
542 Sterile Conditions." Front Immunol **12**: 683803.

543 Neumann, E., R. Hasseli, U. Lange and U. Muller-Ladner (2018). "The Role of Extracellular Nucleic  
544 Acids in Rheumatoid Arthritis." Curr Pharm Biotechnol **19**(15): 1182-1188.

545 Preissner, K. T., S. Fischer and E. Deindl (2020). "Extracellular RNA as a Versatile DAMP and Alarm  
546 Signal That Influences Leukocyte Recruitment in Inflammation and Infection." Front Cell Dev Biol **8**:  
547 619221.

548 Presolski, S. I., V. P. Hong and M. G. Finn (2011). "Copper-Catalyzed Azide-Alkyne Click Chemistry for  
549 Bioconjugation." Curr Protoc Chem Biol **3**(4): 153-162.

550 Sacre, S., A. Lo, B. Gregory, M. Stephens, G. Chamberlain, P. Stott and F. Brennan (2016).  
551 "Oligodeoxynucleotide inhibition of Toll-like receptors 3, 7, 8, and 9 suppresses cytokine production  
552 in a human rheumatoid arthritis model." Eur J Immunol **46**(3): 772-781.

553 Sacre, S. M., A. Lo, B. Gregory, R. E. Simmonds, L. Williams, M. Feldmann, F. M. Brennan and B. M.  
554 Foxwell (2008). "Inhibitors of TLR8 reduce TNF production from human rheumatoid synovial  
555 membrane cultures." J Immunol **181**(11): 8002-8009.

556 Schmidt, B., E. Engel, T. Carstensen, S. Weickmann, M. John, C. Witt and M. Fleischhacker (2005).  
557 "Quantification of free RNA in serum and bronchial lavage: a new diagnostic tool in lung cancer  
558 detection?" Lung Cancer **48**(1): 145-147.

559 Simsekyilmaz, S., H. A. Cabrera-Fuentes, S. Meiler, S. Kostin, Y. Baumer, E. A. Liehn, C. Weber, W. A.  
560 Boisvert, K. T. Preissner and A. Zerneck (2014). "Role of extracellular RNA in atherosclerotic plaque  
561 formation in mice." Circulation **129**(5): 598-606.

562 Sioud, M. (2020). "RNA Interference and CRISPR Technologies Technical Advances and New  
563 Therapeutic Opportunities Preface." Rna Interference and Crispr Technologies: Technical Advances  
564 and New Therapeutic Opportunities **2115**: V-Vii.

565 Song, W., J. Ye, N. Pan, C. Tan and M. Herrmann (2020). "Neutrophil Extracellular Traps Tied to  
566 Rheumatoid Arthritis: Points to Ponder." Front Immunol **11**: 578129.

567 Sorensen, O., K. Arnljots, J. B. Cowland, D. F. Bainton and N. Borregaard (1997). "The human  
 568 antibacterial cathelicidin, hCAP-18, is synthesized in myelocytes and metamyelocytes and localized to  
 569 specific granules in neutrophils." *Blood* **90**(7): 2796-2803.  
 570 Tabeta, K., K. Hoebe, E. M. Janssen, X. Du, P. Georgel, K. Crozat, S. Mudd, N. Mann, S. Sovath, J.  
 571 Goode, L. Shamel, A. A. Herskovits, D. A. Portnoy, M. Cooke, L. M. Tarantino, T. Wiltshire, B. E.  
 572 Steinberg, S. Grinstein and B. Beutler (2006). "The Unc93b1 mutation 3d disrupts exogenous antigen  
 573 presentation and signaling via Toll-like receptors 3, 7 and 9." *Nat Immunol* **7**(2): 156-164.  
 574 Vierbuchen, T., C. Bang, H. Rosigkeit, R. A. Schmitz and H. Heine (2017). "The Human-Associated  
 575 Archaeon *Methanosphaera stadtmanae* Is Recognized through Its RNA and Induces TLR8-Dependent  
 576 NLRP3 Inflammasome Activation." *Front Immunol* **8**: 1535.  
 577 Vlach, J., A. T. Bender, M. Przetak, A. Pereira, A. Deshpande, T. L. Johnson, S. Reissig, E. Tzvetkov, D.  
 578 Musil, N. T. Morse, P. Haselmayer, S. C. Zimmerli, S. L. Okitsu, R. L. Walsky and B. Sherer (2021).  
 579 "Discovery of M5049: A Novel Selective Toll-Like Receptor 7/8 Inhibitor for Treatment of  
 580 Autoimmunity." *J Pharmacol Exp Ther* **376**(3): 397-409.  
 581 Warnatsch, A., M. Ioannou, Q. Wang and V. Papayannopoulos (2015). "Inflammation. Neutrophil  
 582 extracellular traps license macrophages for cytokine production in atherosclerosis." *Science*  
 583 **349**(6245): 316-320.  
 584 Zack, G. W., W. E. Rogers and S. A. Latt (1977). "Automatic-Measurement of Sister Chromatid  
 585 Exchange Frequency." *Journal of Histochemistry & Cytochemistry* **25**(7): 741-753.  
 586 Zernecke, A. and K. T. Preissner (2016). "Extracellular Ribonucleic Acids (RNA) Enter the Stage in  
 587 Cardiovascular Disease." *Circ Res* **118**(3): 469-479.  
 588 Zhang, S., Z. Hu, H. Tanji, S. Jiang, N. Das, J. Li, K. Sakaniwa, J. Jin, Y. Bian, U. Ohto, T. Shimizu and H.  
 589 Yin (2018). "Small-molecule inhibition of TLR8 through stabilization of its resting state." *Nat Chem*  
 590 *Biol* **14**(1): 58-64.  
 591

## 592 **Additional information**

593 **Author contributions:** according to Credit guidelines:

|                             | FB | CGL | CY | SC | YW | MN | JF | JS | PE | MD | KH | BS | MWL | YS | NKA | AN |
|-----------------------------|----|-----|----|----|----|----|----|----|----|----|----|----|-----|----|-----|----|
| Conceptualization           | x  |     |    |    |    |    |    |    |    |    |    |    |     |    |     |    |
| Data curation               |    |     |    |    |    |    |    |    |    |    |    |    |     |    |     |    |
| Formal analysis             | x  | x   | x  | x  |    | x  | x  | x  | x  |    | x  |    |     |    | x   |    |
| Funding acquisition         |    |     |    |    |    |    |    |    |    |    |    | x  |     |    |     |    |
| Investigation               | x  | x   | x  | x  |    | x  | x  | x  | x  | x  | X  |    |     |    |     |    |
| Methodology                 |    |     |    |    |    |    |    |    |    |    | X  |    |     | x  |     |    |
| Project administration      |    |     |    |    | x  |    |    |    |    |    |    |    | X   |    |     |    |
| Resources                   |    |     |    |    |    |    |    |    |    |    |    |    | X   |    |     |    |
| Software                    |    |     |    |    |    |    |    |    |    |    |    |    |     |    |     |    |
| Supervision                 | X  |     |    |    |    |    |    |    |    |    |    | x  |     | x  | x   |    |
| Validation                  | X  |     |    |    |    |    |    |    |    |    |    |    |     |    | x   |    |
| Visualization               | x  | x   | x  |    |    |    |    |    |    |    | X  |    |     |    |     |    |
| Writing: original draft     | x  |     |    |    |    |    |    |    |    |    |    |    |     |    |     |    |
| Writing: review and editing | x  | x   | x  | x  | x  | x  | x  | x  | x  | x  | x  | x  | x   | x  | x   | x  |

594

## 595 **Conflict of interest statement**

596 NKA has received previous grant support from Pfizer and Boehringer Ingelheim and was a paid  
 597 consultant for Janssen Pharmaceuticals. All other authors declare no competing interests. S.D.G.

## 598 **Acknowledgments**

599 We gratefully acknowledge Jim Rheinwald, Holger Heine, Austin Chang, Thomas Zillinger for the  
600 provision of reagents, respectively, and Jon Kagan and Libera Lo Presti for helpful scientific and  
601 editorial comments. We thank all voluntary healthy donors of biomaterials for participating in the  
602 study. The study was supported by the Deutsche Forschungsgemeinschaft (German Research  
603 Foundation, DFG) grants CRC TR156 “The skin as an immune sensor and effector organ – Orchestrating  
604 local and systemic immunity” (to FB, CG, JF, JS, BS and ANRW), NIH grants R01AI146177, R01AR073665,  
605 and R01AR069502 (to NKA). NKA. has received previous grant support from Pfizer and Boehringer  
606 Ingelheim and was a paid consultant for Janssen Pharmaceuticals. Infrastructural funding was provided  
607 by the University of Tübingen, the University Hospital Tübingen and the DFG Clusters of Excellence  
608 “iFIT – Image-Guided and Functionally Instructed Tumor Therapies” (EXC 2180, to AW, PE, BS and  
609 MWL), “CMFI – Controlling Microbes to Fight Infection (EXC 2124 to AW and BS). Gefördert durch die  
610 Deutsche Forschungsgemeinschaft (DFG) im Rahmen der Exzellenzstrategie des Bundes und der  
611 Länder - EXC 2180 and EXC 2124. The authors declare no competing financial interests.

612

## 613 **Abbreviations**

614 AF – Alexa Fluor; bRNA – bacterial ribonucleic acid; DAMP – damage-associated molecular pattern; 5-  
615 EU – 5-Ethynyluridine; FACS – Fluorescence Activated Cell Sorting; fRNA – fungal ribonucleic acid; HEK  
616 – Human embryonic kidney; HMGB-1 – High-Mobility-Group-Protein B1; HSC – hematopoietic stem  
617 cell; IFN – Interferon; IL – Interleukin; KO – knockout; MCET – Mast cell extracellular trap; MET –  
618 Macrophage extracellular trap; MPO – Myeloperoxidase; naRNA – Neutrophil extracellular trap-  
619 associated RNA; NET – Neutrophil extracellular trap; NK – natural killer; PAD4 - Peptidyl arginine  
620 deiminase 4; PBMC - Peripheral Blood Mononuclear Cell; PKC- Protein kinase C; PMN –  
621 Polymorphonuclear leukocytes; RT – room temperature; SEM – scanning electron microscopy; TLR –  
622 Toll-like receptor; TNF – Tumor necrosis factor

## 623 **Materials and Methods**

### 624 **Reagents**

625 PMA (tlrl-pma), Nigericin (tlrl-nig), LL37 (tlrl-l37), as well as the PRR ligands LPS (tlrl-pek1ps), R848 (tlrl-  
626 r848), TL8 (tlrl-tl8506), and the TLR8-inhibitor CU-CPT9a (inh-cc9a) were from Invivogen, Ionomycin  
627 was acquired from Sigma (I0634-1MG). RNase inhibitor (N2615) was from Promega, RNase A (EN0531),  
628 DNase I (EN0521) and DNase inhibitor (EN0521) were from Thermo Fisher. The PAD4-inhibitor Cl-  
629 amidine (506282) was from Merck Millipore. DOTAP (L787.2) was from Roth (see Supplementary Table  
630 S1) and ssRNA40 was from Eurogentec (see Supplementary Table S2). Bacterial RNA isolated from *S.*  
631 *aureus* was prepared as described (Herster, Bittner et al. 2020). Fungal RNA from *C. albicans* strain  
632 SC5314 was isolated as described below, as well as naRNA isolated from PMA NETs. For complex  
633 formation to stimulate cells in a volume of 500  $\mu$ L, 5.8  $\mu$ M ssRNA40 (~ 34.4  $\mu$ g/mL), fungal RNA (125  
634 ng/mL), bacterial RNA (10  $\mu$ g/mL) or PMA NET derived naRNA (~ 600 ng/mL) was mixed with 10  $\mu$ g  
635 LL37 and left for 1 h at room temperature (RT). For a smaller volume of cells, complexes were used in  
636 the according fractional amount. For RNA-only or LL37-only controls, the same amounts and volumes  
637 were used replacing one of the components with sterile, endotoxin-free H<sub>2</sub>O. For complex formation  
638 with DOTAP, the according RNA or CpG was incubated with the transfection reagent for 10 min at RT  
639 prior to stimulation of the cells. NET content for stimulation was prepared as described below.  
640 Antibodies used for fluorescence microscopy, as well as click chemistry reagents are listed in  
641 Supplementary Tables S3 and S4. Constructs used for transfection of HEK293T cells are listed in  
642 Supplementary Table S5.

### 643 **Preparation of fungal RNA from *C. albicans***

644 *C. albicans* SC5314 (kindly cultured and prepared by Tzu-Hsuan Chang, Tübingen) was plated in a slant  
645 tube containing YPD agar and grown overnight at 30 °C as described in (Chang, Gloria et al. 2022). One  
646 colony was picked from the slant tube and resuspended in 500  $\mu$ L YPD medium, centrifuged at 10,000  
647 rpm for 1 min and washed with phosphate-buffered saline (PBS). Afterwards, the pellet was  
648 resuspended in 200  $\mu$ L RLT buffer (derived from RNeasy Mini Kit, Qiagen, #74106) and transferred into  
649 a 2 mL tube containing 0.5 mm diameter ceramic beads. The tube was filled up to 1 mL with RLT buffer  
650 and the fungi were subsequently homogenized by using a microtube homogenizer (BeadBug™, Merck)  
651 with an interval of seven times 2 min shaking at 2800 rpm and 1 min cooling break on ice. The  
652 supernatant was transferred into a new tube containing 1 mL 75% ethanol (VWR, 20821.330). The  
653 further RNA isolation was performed according to the manufacturer's instructions using the Qiagen  
654 RNeasy Mini Kit for purification of Total RNA from Animal Tissues (RNeasy Mini Kit, Qiagen, 74106).  
655 The RNA was eluted in 30  $\mu$ L RNase DNase-free H<sub>2</sub>O and the concentration was determined with a  
656 Nanodrop Spectrophotometer.

### 657 **Mice**

658 *Unc93b1<sup>3d/3d</sup>* (Tabeta, Hoebe et al. 2006), *Tlr13<sup>-/-</sup>* (Li and Chen 2012) (both kindly provided by Tatjana  
659 Eigenbrod, Heidelberg and on C57BL/6 background) and WT C57BL/6 mice between 8 and 20 weeks  
660 of age were used in accordance with local institutional guidelines on animal experiments, regular  
661 hygiene monitoring, and specific locally approved protocols compliant with the German regulations of  
662 the Gesellschaft für Versuchstierkunde/Society for Laboratory Animal Science (GV-SOLAS) and the  
663 European Health Law of the Federation of Laboratory Animal Science Associations (FELASA) for  
664 sacrificing and *in vivo* work. *Unc93b1<sup>3d/3d</sup>*, *Tlr13<sup>-/-</sup>* and WT C57BL/6 control mice were housed in  
665 controlled specific-pathogen-free animal facilities at the Interfaculty Institute of Cell Biology, Tübingen.  
666 Local federal authority for the approval of experimental protocols was the Regierungspräsidium  
667 Tübingen. *LysM<sup>EGFP/+</sup>* (Faust, Varas et al. 2000), *Tlr13<sup>-/-</sup>* mice (Li and Chen 2012) (kindly provided by  
668 James Chen, Houston and David Nemazee, La Jolla) and WT (all on a C57BL/6 background) mouse  
669 strains were also bred and maintained under the specific pathogen-free conditions, with air isolated  
670 cages at an American Association for the Accreditation of Laboratory Animal Care (AAALAC)-accredited

671 animal facility at Johns Hopkins University and handled according to procedures described in the Guide  
672 for the Care and Use of Laboratory Animals as well as Johns Hopkins University's policies and  
673 procedures as set forth in the Johns Hopkins University Animal Care and Use Training Manual, and all  
674 animal experiments were approved by the Johns Hopkins University Animal Care and Use Committee  
675 (MO21M378). Gender- and age-matched 6-8 week old mice were used for each experiment.

#### 676 **Isolation and stimulation of primary bone-marrow-derived polymorphonuclear neutrophils (BM- 677 PMNs)**

678 Bone-marrow (BM)-PMNs were isolated from the bone marrow as described (Herster, Bittner et al.  
679 2020). In brief, bones were isolated from the respective mice and the bone marrow was flushed out.  
680 Afterwards, neutrophils were isolated using magnetic separation (mouse Neutrophil isolation kit,  
681 Miltenyi Biotec, 130-097-658) following the manufacturer's instructions. In total,  $1 \times 10^5$  cells/well  
682 PMNs were seeded in a 24-well plate, and stimulation was carried out with PMA (600 nM), ssRNA+LL37  
683 complex (as previously described), nigericin (50  $\mu$ M), live *C. albicans* (MOI1) or human NET content  
684 (mock control and PMA NETs, 1:50 dilution) for 16 h at 37°C and 5% CO<sub>2</sub>. Subsequently, cells were  
685 stained for immunofluorescence.

#### 686 **Study participants and human blood or tissue sample acquisition**

687 All healthy donors included in this study provided their written informed consent before participation.  
688 Approval for use of biomaterials was obtained for this project by the local ethics committee of the  
689 Medical Faculty Tübingen in accordance with the principles laid down in the Declaration of Helsinki as  
690 well as applicable laws and regulations.

#### 691 **Primary human neutrophil isolation and stimulation**

692 Neutrophils of healthy human donors were isolated as described (Herster, Bittner et al. 2020). In brief,  
693 EDTA-anticoagulated whole blood was diluted in PBS (Thermo Fisher, 14190-169), loaded on Ficoll  
694 (1.077 g/mL, Sigma, 10771) and centrifuged for 25 min at 509 x g at RT without brake. Afterwards, all  
695 layers except the erythrocyte-granulocyte layer were discarded and erythrocyte lysis was performed  
696 twice (for 20 and for 10 min) using 1x ammonium chloride erythrocyte lysis buffer (see Supplementary  
697 Table S6) at 4 °C on roller shaker. The remaining cells were resuspended in culture medium (RPMI  
698 culture medium (Sigma-Aldrich, R8758) + 10% FBS (heat-inactivated, sterile filtered, Th. Geyer,  
699 11682258)) to a concentration of  $1.6 \times 10^6$  cells/mL. 500  $\mu$ L of cells were seeded in a 24-well plate for  
700 immunofluorescence microscopy or 8 mL of  $5 \times 10^6$  cells/mL in 10 cm uncoated dishes for NET  
701 preparation and naRNA isolation/isolation of whole PMN RNA. After seeding, the cells were rested for  
702 30 min at 37°C and 5% CO<sub>2</sub>, followed by 3 h stimulation with PMA (600 nM), nigericin (50  $\mu$ M), live *C.*  
703 *albicans* (MOI2), RNA+LL37 complexes (as previously described) or NET content at indicated dilutions  
704 for IF or 4 h stimulation with PMA (600 nM) for NET preparation. Where indicated, the cells were  
705 incubated with 100 nM TLR8-inhibitor CU-CPT9a or 200  $\mu$ M PAD4-inhibitor Cl-amidine 30 min before  
706 stimulation and not replaced during incubation with the respective stimuli.

#### 707 **Primary peripheral blood mononuclear cells (PBMC) isolation and stimulation**

708 PBMCs were isolated from whole blood or buffy coats as described (Herster, Bittner et al. 2020). In  
709 brief, EDTA-anticoagulated blood was diluted in PBS and density gradient separation was performed  
710 as described above. The PBMC layer was then carefully transferred into another reaction tube and  
711 diluted in PBS (1:1). The cell suspension was spun down at 645 x g for 8 min and the cells were washed  
712 two more times in PBS and resuspended in culture medium (RPMI + 10% FBS (heat inactivated) +1% L-  
713 glutamine) at a density of  $1 \times 10^6$  cells/mL. Afterwards, 200  $\mu$ L of PBMCs were seeded in a 96-well plate  
714 and stimulated with LPS (100 ng/mL), R848 (5  $\mu$ g/mL), TL8 (100 ng/mL), ssRNA (1.6  $\mu$ g/mL) + DOTAP  
715 (50  $\mu$ g/mL), ssRNA+LL37 complex (as described above), and respective NET content (1:20 dilution) for  
716 24 h at 37°C and 5% CO<sub>2</sub>. Where indicated, the TLR8 inhibitor CU-CPT9a was added to the cells at a  
717 concentration of 1  $\mu$ M 2h before stimulation and was not removed for the incubation of the cells with  
718 the respective stimuli. After the stimulation, the plate was centrifuged for 5 min at 1500 rpm and the  
719 supernatant was collected and stored at -80 °C until the ELISA was performed.

## 720 **Preparation of NETs and isolation of naRNA/whole PMN RNA**

721 NETs were prepared by 600 nM PMA treatment for 4 h at 37°C and 5% CO<sub>2</sub>, or cells were left untreated  
722 during the incubation as the mock control. After incubation, the neutrophils were gently washed three  
723 times with PBS to get rid of PMA as the stimulus for NET formation, any cytokines released by the cells  
724 and unstimulated PMNs, as those do not adhere to the uncoated petri dish used here. In some  
725 conditions (as indicated) during the NET preparation process and for storage, naRNA was protected by  
726 addition of 10 U/μL RNase inhibitor (= Mock or PMA NETs + RNase Inhibitor). For digest of NETs with  
727 the respective enzymes, the NET content was incubated for 20 min at 37 °C with RNase A (Thermo  
728 Fisher, EN0531; 100 μg/mL, EDTA for DNase inhibition added) or DNase I (Thermo Fisher, EN0521) for  
729 60 min at 37 °C (1 U/10 μL, RNase inhibitor for RNase inhibition added). For isolation of naRNA, RNase  
730 inhibitor was added to the PMNs during NET formation. After the above described washing process,  
731 PMA or mock NETs were resuspended in 300 μL of ML buffer and RNA isolation was performed  
732 according to the manufacturer's instructions (NucleoSpin miRNA isolation kit, Macherey-Nagel,  
733 740971.50). The RNA was eluted in 50 μL RNase/DNase/endotoxin-free H<sub>2</sub>O and the concentration  
734 was determined with a Nanodrop Spectrophotometer. For isolation of whole PMN RNA, untreated  
735 PMNs were directly lysed, and the RNA was isolated from the cells according to the manufacturer's  
736 instructions.

## 737 **Preparation of human primary stem cell-derived PMNs**

738 Stem cells derived from human healthy donors were prepared and differentiated as described (Sioud  
739 2020). In brief, bone marrow was diluted in PBS, carefully layered on Ficoll-Paque medium (density:  
740 1.077 g/mL) and centrifuged at 500 x g for 25 min at RT without brakes. The interphase layer containing  
741 the mononuclear cell fraction was transferred to a new tube and washed twice with 30 mL ice-cold  
742 PBS by centrifugation at 300 x g for 8 min at 8 °C. Further, the cells were resuspended, counted, and  
743 isolated using Human CD34 MicroBead Kit (Miltenyi) for magnetic beads-based isolation of CD34<sup>+</sup> cells  
744 from BMMNCs. Afterwards, the number of CD34<sup>+</sup> HPSCs was determined and cultured in CD34<sup>+</sup> culture  
745 medium (Stemline II Hematopoietic Stem Cell Expansion medium supplemented with 10% FCS, 1% L-  
746 glutamine, 1% penicillin/streptomycin, and a human recombinant cytokine cocktail consisting of 20  
747 ng/mL IL-3, 20 ng/ mL IL-6, 20 ng/mL TPO, 50 ng/mL SCF, and 50 ng/mL FLT-3L) at a density of 2 x  
748 10<sup>5</sup>/mL at 37 °C and 5% CO<sub>2</sub>. The medium was replaced every second day and the cells were cultured  
749 for 14 days. During the differentiation process, the cells were treated with 100 μM 5-ethynyl uridine  
750 for 14 days for subsequent click chemistry labeling of endogenous RNA or were left untreated as  
751 negative controls. To verify differentiation, cell morphology was assessed using Cytospin assay. In brief,  
752 the Cytoclip™ slide clips were loaded by fitting the filter card, the sample chamber, and the glass slide.  
753 An assemble Cytoclip™ slide clip was then placed in the slide clip support plate of the cytospin  
754 centrifuge. 2 x 10<sup>4</sup> cells from liquid culture differentiation were pipetted into Cytofunnel™ and  
755 centrifuged for 3 min at 200 x g. The cytospin slides were stained for 5 min in May-Grünwald stain,  
756 rinsed shortly with ddH<sub>2</sub>O, and then stained for 10 min in Wright-Giemsa stain. Afterwards, the slides  
757 were rinsed shortly with ddH<sub>2</sub>O and cell morphology was determined using a microscope. To further  
758 verify differentiation, flow cytometric analysis was performed using antibodies specific for the  
759 following hematopoietic/myeloid markers: CD45 (leukocyte marker), CD34 (HSPC marker), CD33  
760 (promyelocyte marker), CD11b (myeloid cell marker), CD14 (monocyte marker), and CD15 and CD16  
761 (neutrophil markers). Neutrophil percentage was determined by gating on neutrophils as follows:  
762 CD45<sup>+</sup>CD11b<sup>+</sup>CD15<sup>+</sup>, or CD45<sup>+</sup>CD11b<sup>+</sup>CD16<sup>+</sup>, or CD45<sup>+</sup>CD15<sup>+</sup>CD16<sup>+</sup> cells

## 763 **BlaER1 cell culture, transdifferentiation and stimulation**

764 BlaER1 cells (WT, *Unc93b*<sup>-/-</sup> and *Tlr8*<sup>-/-</sup>), a kind gift of Holger Heine, Borstel, Germany (Vierbuchen, Bang  
765 et al. 2017), were cultured, transdifferentiated, and stimulated for 18 h with the respective stimuli as  
766 described (Herster, Bittner et al. 2020). In brief, 1x10<sup>6</sup> cells/well were seeded in a 6-well plate and  
767 differentiated with 10 ng/mL hIL-3, 10 ng/mL hMCSF and 150 nM β-estradiol in complete RPMI-1640  
768 (PANBiotech, P04-18525) for 7 days. Afterwards 5 x 10<sup>4</sup> differentiated cells were reseeded in a 96-well  
769 plate, followed by 1 h resting. Cells were treated with the respective stimuli (LPS at 0.1 μg/mL, R848 at

770 5 µg/mL, the TLR8 agonist TL8 at 100 ng/mL or ssRNA+LL37 complex as described above) and Mock or  
771 PMA NETs with or without RNase inhibitor) in complete medium in a total volume of 125 µL/well for  
772 18 h. After stimulation, the cells were centrifuged for 5 min at 1200 rpm, the supernatant was  
773 transferred into a new plate and stored at -80°C until the ELISA was performed.

#### 774 **THP-1 cell culture, differentiation and stimulation**

775 THP-1 cells (THP-1 cells were a kind gift from Thomas Zillinger, Bonn, Germany (Coch, Hommertgen et  
776 al. 2019), were cultured in complete RPMI-1640 (Sigma, R8758-24X500ML) medium. For  
777 differentiation into macrophage-like cells,  $5 \times 10^4$  cells/well were seeded in a 96-well plate, treated  
778 with 300 ng/mL PMA and incubated for 16 h at 37°C and 5% CO<sub>2</sub>. The next day, the cells were washed  
779 three times with PBS and fresh medium was added, followed by 48 h of resting. Subsequently, the  
780 medium was removed, exchanged by medium containing 200 U/mL IFN-γ (Sigma, I-3265), and the cells  
781 were incubated for 6 h. After repeated washing and medium exchange, cells were treated with the  
782 respective stimuli (PMA (25 µg/mL) + Ionomycin (0.375 µg/mL), LPS (0.1 µg/mL), R848 (5 µg/mL), TL8  
783 (40 ng/mL), ssRNA+LL37 complex (as described above), Mock NETs + RNase inhibitor (1:50 dilution),  
784 PMA NETs (1:50 dilution) and PMA NETs + RNase inhibitor (1:50 dilution)) in complete medium in a  
785 total volume of 125 µL/well for 18 h. After stimulation, the cells were centrifuged for 5 min at 1200  
786 rpm, the supernatant was transferred into a new plate and stored at -80°C until the ELISA was  
787 performed.

#### 788 **N/TERT-1 keratinocyte cell culture and stimulation**

789 N/TERT-1 cells (a kind gift from Prof. James Rheinwald (Dickson, Hahn et al. 2000)) were cultured for  
790 less than ten passages in complete CnT-07 medium (CELLnTEC, CnT-07). Two days prior to stimulation,  
791 a total amount of  $2 \times 10^4$  cells/well were seeded in a 96-well plate and incubated at 37°C and 5% CO<sub>2</sub>.  
792 The medium was renewed, and the cells were stimulated in a total volume of 125 µL/well of the  
793 respective stimuli diluted in medium (PMA (25 µg/mL) + Ionomycin (0.375 µg/mL), TL8 (200 ng/mL),  
794 ssRNA+LL37 complex (as previously described), as well as Mock and PMA NETs with and without RNase  
795 inhibitor at indicated dilutions). After 24 h stimulation, the cells were centrifuged at 1200 rpm for 5  
796 min and the supernatant was stored in a new plate at -80°C until further usage.

#### 797 **Primary normal human epidermal keratinocyte (NHEK) cell culture and stimulation**

798 NHEK cells (Normal Human Epidermal Keratinocytes (NHEK) single juvenile donor, proliferating,  
799 PromoCell, C-12002) were grown and stimulated in Keratinocyte Growth Medium 2 (PromoCell, C-  
800 20111). Two days prior to stimulation, a total amount of  $2 \times 10^4$  cells/well were seeded in a 96-well  
801 plate and incubated at 37°C and 5% CO<sub>2</sub>. For stimulation, the medium was renewed with basal medium  
802 (PromoCell, C-20211) containing 1.7 mM CaCl<sub>2</sub> (Roth, CN93.1) and stimuli were added and diluted in  
803 medium in a final volume of 125 µL (R848 (20 µg/mL), TL8 (200 ng/mL), ssRNA+LL37 complex, as well  
804 as Mock NETs + RNase inhibitor (1:25 dilution) and PMA NETs with and without RNase inhibitor (1:25  
805 dilution). After 24 h stimulation, the cells were centrifuged at 1200 rpm for 5 min and the supernatant  
806 was stored in a new plate at -80°C until further usage.

#### 807 **Preparation of 3D human skin equivalent**

808 The 3D human skin equivalent was prepared as described (Bitschar, Staudenmaier et al. 2020). Briefly,  
809 primary fibroblasts were seeded on collagen and incubated in FF medium for five days. Subsequently,  
810 primary keratinocytes were added to the wells and airlifting was performed on day 12. On day 22, the  
811 3D skin model was stimulated with NET content (25 µL/well for one 3D construct grown in a 12-well  
812 chamber) or respective water control for 24 h. Afterwards, supernatant was harvested for ELISA, RNA  
813 was isolated for qPCR analysis and H&E staining was performed.

#### 814 **NK-92 MI cell culture and stimulation**

815 NK-92 MI cells (kindly provided by Melanie Märklin, University Hospital Tübingen) were cultured in  
816 IMDM-Medium (Lonza, 12-722F). For stimulation, a total amount of  $1 \times 10^5$  cells/well were seeded in  
817 a volume of 200 µL and rested for 2 h at 37°C and 5% CO<sub>2</sub>. The cells were stimulated with LPS (100

818 ng/mL), CpG (2.5  $\mu$ M) + DOTAP (25  $\mu$ g/mL), R848 (5  $\mu$ g/mL), TL8 (100 ng/mL), ssRNA (1.6  $\mu$ g/mL) +  
819 DOTAP (50  $\mu$ g/mL), ssRNA+LL37 complex (as described above), or NET content (1:100 dilution) for 24  
820 h and afterwards centrifuged for 5 min at 1500 rpm. Subsequently, the supernatant was transferred  
821 into a new plate and stored at -80°C until further usage.

## 822 **Flow cytometry**

823 After PMN isolation, the purity and activation status of the cells was determined by flow cytometry as  
824 described (Herster, Bittner et al. 2020). In brief, 200  $\mu$ L of cells were transferred into a 96-well plate  
825 (U-bottom) and centrifuged for 5 min at 448 x g. Afterwards, blocking was performed using pooled  
826 human serum diluted 1:10 in PBS for 15 min at 4 °C. After washing, the samples were stained for 20 min  
827 at RT in the dark and fixed (4% PFA in PBS) after repeated washing for 10 min at RT in the dark. After  
828 an additional washing step, the cell pellets were resuspended in 300  $\mu$ L PBS and measurements were  
829 performed on a FACS Canto II (BD Bioscience, Diva software). Analysis was performed using FlowJo  
830 V10 analysis software.

## 831 **RNA sequencing analysis of naRNA**

832 Isolated naRNA was analyzed for quality control using the Agilent 4200 TapeStation system.  
833 Subsequently, the RNA was sequenced according to NEBNext® Ultra™ II Directional RNA Library Prep  
834 Kit for Illumina® using the protocol for use with rRNA Depleted FFPE RNA. The data was quantified using  
835 Salmon Version1.5.0 and tximport was used to obtain the transcript-level quantification. For transcript  
836 classification, GENECODE annotation was performed.

## 837 **Fluorescence microscopy of fixed human or murine primary neutrophils**

838 500  $\mu$ L of  $1.6 \times 10^6$  cells/mL of human blood PMNs, and  $2 \times 10^6$  cells/mL murine BM-PMNs were seeded  
839 in a 24-well plate containing poly-L-lysine-coated glass coverslips (Electron Microscopy Sciences,  
840 72292-04) and rested for 30 min before stimulation at 37°C and 5% CO<sub>2</sub> with the according stimuli (as  
841 described above) for 3 h (human) or 16 h (murine), respectively, as adapted from Brinkmann *et al.*,  
842 2004 (Brinkmann, Reichard et al. 2004). After stimulation, the cells were carefully washed with PBS  
843 and fixed with fixation buffer (Biolegend, 420801) for 10 min at RT in the dark. Afterwards, the cells  
844 were blocked with PBS containing 0.1 % heat-inactivated diethylpyrocarbonate (DEPC) (Roth, K028.2),  
845 10 % chicken serum (Normal Chicken Serum Blocking Solution S-3000, Biozol/Vectorlabs, VEC-S-3000-  
846 20), 0.1 % saponin (Applichem, A4518.0100), as well as 10 U/ $\mu$ L RNase inhibitor for 2 h at RT. The  
847 primary antibodies (rRNA Y10b, hLL37, see Supplementary Table S3) were diluted 1:50 in blocking  
848 buffer and subsequently incubated for 2 h at RT. Afterwards, the cells were washed three times with  
849 PBS containing 0.1 % heat-inactivated DEPC and incubated with the secondary antibodies (see  
850 Supplementary Table S3) in a 1:500 dilution in blocking buffer for 1 h. After repeated washing, the cells  
851 were incubated with Hoechst 33342 (Thermo Fisher; 1  $\mu$ g/mL) for 5 min to stain nuclear DNA.  
852 Secondary antibodies alone did not yield any significant staining under identical staining and  
853 acquisition conditions. The coverslips were mounted (ProLong™ Diamond Antifade Mountant, Thermo  
854 Fisher, P36961) on glass slides and left to dry overnight at RT in the dark. Subsequently, the samples  
855 were stored at 4 °C before microscopy using a Zeiss LSM800 Confocal microscope (40x or 63x  
856 magnification with Z-stack acquisition, AiryScan mode) and image analysis using ImageJ-Win64 and  
857 Zen Blue3 software was performed.

## 858 **Quantification of NET formation**

859 To quantify the formation of NETs, microscopy images were obtained using a Zeiss LSM800 Confocal  
860 microscope with a 40x objective and 3x3 tiles acquisition. Three images per sample of three biological  
861 replicates were taken. To quantify NET formation by using NET-related signal dispersion of rRNA and  
862 DNA signal, ImageJ software was used, and a threshold (Triangle threshold) was applied as originally  
863 described (Zack, Rogers et al. 1977). Particles were analyzed with a ROI (region of interest) manager  
864 (size ( $\mu\text{m}^2$ ): 100-infinity (pixel units); circularity 0.00-1.00) and average size and number of particles  
865 (ROIs) were assessed. In NETs, RNA and DNA signals showed up in a greater number and smaller size,  
866 making the usage of the ratio suitable as a measurement of NET-related signal dispersion. In the case



867 of using the DNA signal only to assess NET formation, ImageJ software was used to create a PNG image  
868 and a grid with 8x8 tiles was manually applied to the images. Tiles containing extracellular DNA  
869 structures were manually counted in a blinded manner as NET-positive tiles.

#### 870 **Live fluorescence microscopy of enzymatic digest of human NETs**

871 500  $\mu\text{L}$  of  $1.6 \times 10^6$  cells/mL of human blood PMNs were seeded in a 4-well glass bottom microscopy  
872 cell culture dish (Greiner, 627871) and rested for 30 min before stimulation at  $37^\circ\text{C}$  and 5%  $\text{CO}_2$  with  
873 PMA (600 nM) for 3 h. After stimulation, the medium was carefully removed and the cells were washed  
874 with PBS before adding fresh culture medium (RPMI culture medium without phenol red (Sigma-  
875 Aldrich, R7509) + 10% FBS (heat inactivated, sterile filtered, TH Geyer, 11682258)). Hoechst 33342  
876 (Thermo Fisher, 1  $\mu\text{g}/\text{mL}$ ) to stain nuclear DNA and SYTO RNaselect Green fluorescent dye (Thermo  
877 Fisher, 50  $\mu\text{M}$ ) to stain naRNA was added to the cells, as well as RNase A (Thermo Fisher, EN0531; 100  
878  $\mu\text{g}/\text{mL}$ ) or DNase I (Thermo Fisher, EN0521, 1 U/10  $\mu\text{L}$ ) was added between time point 0 and 5 min.  
879 Live cell imaging was performed using a Zeiss LSM800 Confocal microscope with a 63x objective and  
880 Z-stack acquisition, taking an image every 5 min for 30-60 min respectively. Image analysis and video  
881 creation was performed using ImageJ-Win64.

#### 882 **Click chemistry of primary, stem cell-derived PMNs and fluorescence microscopy**

883 500  $\mu\text{L}$  of  $1.6 \times 10^6$  cells/ml of human stem cell-derived PMNs treated with 5-ethynyl uridine or left  
884 untreated were seeded in a 24-well plate containing poly-L-lysine-coated glass coverslips and rested  
885 for 30 min before stimulation with PMA (600 nM) at  $37^\circ\text{C}$  and 5%  $\text{CO}_2$  for 12 h. After stimulation, the  
886 cells were washed and permeabilized with ice-cold acetone (Applichem, A1582.2500PE) 1:1 methanol  
887 (Honeywell, 32213-2.5L) for 5 min at RT. Subsequently, the click chemistry (reagents see  
888 Supplementary Table S4) labeling of endogenous RNA was performed as described (Presolski, Hong et  
889 al. 2011). Briefly, in a total volume of 500  $\mu\text{L}$ , 2  $\mu\text{L}$  of AF546-Azide, a pre-mixture of 1 mM  $\text{CuSO}_4$  and  
890 1.25 mM THPTA, 5 mM aminoguanidine-hydrochloride and 5 mM Na-ascorbate in PBS were added to  
891 the cells in a 24-well plate. The wells were sealed with plastic foil and incubated for 1 h at RT while  
892 shaking in the dark. For negative controls, 5-ethynyl uridine untreated cells incubated with complete  
893 click chemistry reagents and 5-ethynyl uridine treated cells incubated with PBS and AF546-Azide only  
894 were used. No significant signals were observed. After the incubation, the cells were washed three  
895 times for 5 min with PBS and counterstained with rRNA Y10b-AF647 (see Supplementary Table S3) at  
896 1:50 in PBS for 2 h at RT in the dark. After repeated washing, the cells were incubated with Hoechst  
897 33342 to stain nuclear DNA and mounted as described above. Imaging and analysis were performed  
898 as previously described.

#### 899 **Electron microscopy**

900 For Electron microscopy, 500  $\mu\text{L}$  of  $1.6 \times 10^6$  cells/ml of human blood-derived PMNs were seeded in a  
901 24-well plate containing coverslips which were pre-coated with 0.01 % poly-L-lysine (Sigma, A-005-C)  
902 for 15 min at  $37^\circ\text{C}$ . Cells were rested for 30 min at  $37^\circ\text{C}$  and 5%  $\text{CO}_2$  and subsequently stimulated with  
903 1200 nM PMA for 3 h. Afterwards, the cells were fixed in 2.5% glutaraldehyde in PBS for 1 h at room  
904 temperature followed by  $4^\circ\text{C}$ . Samples were post-fixed with 1% osmium tetroxide for 1 h on ice.  
905 Subsequently, samples were dehydrated in a graded ethanol series followed by critical point drying  
906 (CPD300, Leica Microsystems) with  $\text{CO}_2$ . Finally, the cells were sputter-coated with a 4 nm thick layer  
907 of platinum (CCU-010, Safematic) and examined with a field emission scanning electron microscope  
908 (Regulus 8230, Hitachi High Technologies) at an accelerating voltage of 3 kV. For antibody labeling,  
909 cells treated as described above were fixed in 4% formaldehyde in PBS for 1-2 hours at room  
910 temperature and  $4^\circ\text{C}$  overnight. After washing and blocking (0.2% gelatin in PBS) samples were  
911 incubated for 1 h at room temperature with rRNA Y10b as the primary antibody in blocking buffer and  
912 for 1 h at RT with goat anti-mouse antibodies coupled to 12 nm or 6 nm gold in blocking buffer (Jackson  
913 ImmunoResearch, code numbers 115-205-146 and 115-195-166, respectively). Samples labeled with 6  
914 nm gold were further silver enhanced. Following immunolabeling, the samples were treated with 1%  
915 uranyl acetate for 5 min at RT, dehydrated and critical point dried as before. Samples were sputter-

916 coated with a 5 nm thick layer of carbon (CCU-010, Safematic) and analyzed in the SEM with an  
917 accelerating voltage of 5 kV.

#### 918 **Transient transfection of HEK293T cells**

919 HEK293T cells were transiently transfected with the respective TLR8, TLR7, TLR9 and NF- $\kappa$ B reporter  
920 plasmids as described (Colak, Leslie et al. 2014) (see Supplementary Table S5 for plasmids) using X-  
921 tremegene™ HP DNA Transfection Reagent (Merck, 6366236001). A total amount of  $5 \times 10^4$  cells/well  
922 were seeded in a 24-well plate one day prior to transfection. For the transfection of one well, 100 ng  
923 of the according TLR plasmid, 100 ng of the firefly luciferase NF- $\kappa$ B reporter and 10 ng *Renilla* luciferase  
924 control reporter was mixed in Opti-MEM™ Reduced Serum Medium (Thermo Fisher, 31985062) in a  
925 total volume of 50  $\mu$ L. After 15 min incubation at RT, the transfection mix was added to the cells and  
926 the cells were incubated for 48 h. Prior to subsequent stimulation, the medium was changed to  
927 complete DMEM medium (Sigma, D5796-24X500ML), and the cells were incubated with the respective  
928 NET content stimuli and controls (R848 (2.5  $\mu$ g/mL), TL8 (100 ng/mL), CpG (1.25  $\mu$ M) + DOTAP (25  
929  $\mu$ g/mL), ssRNA (0.6  $\mu$ g/mL) + DOTAP (20  $\mu$ g/mL), Mock NETs + RNase inhibitor (1:50 dilution), PMA  
930 NETs (1:50 dilution), PMA NETs + RNase inhibitor (1:50)) for 18 h at 37°C and 5% CO<sub>2</sub>. Supernatants  
931 were then removed, and the cells frozen briefly at -80 °C. Subsequently they were used for dual  
932 luciferase assay.

#### 933 **Dual luciferase reporter assay**

934 The dual luciferase reporter assay for detection NF- $\kappa$ B activation after TLR transfection and subsequent  
935 stimulation was performed as described (Herster, Bittner et al. 2020). In brief, supernatants were  
936 removed from the cells after stimulation and 60  $\mu$ L/well of 1X passive lysis buffer (E194A, Promega)  
937 was added. The plate was then incubated for 15 min at RT on the plate shaker and subsequently stored  
938 at -80 °C for at least 15 min to facilitate complete cell lysis. After thawing, the cell solution (60  $\mu$ L) was  
939 transferred into a V-bottom 96-well plate and centrifuged for 10 min at 2500 rpm and 4 °C to pellet  
940 cell debris. Ten microliters of supernatant were then transferred into a white microplate and each  
941 condition was measured in triplicates using the FLUOstar OPTIMA device (BMG Labtech). Firefly and  
942 *Renilla* luciferase activity were determined using the Promega Dual luciferase kit. Both enzyme  
943 activities were measured for 12.5 s with 24 intervals of 0.5 s, respectively. The data was analyzed by  
944 calculating the ratio of the two measured signals, thereby normalizing each firefly luciferase signal to  
945 its corresponding *Renilla* luciferase signal. The ratios were represented as the relative light units (RLU)  
946 of NF- $\kappa$ B activation.

#### 947 **Extracellular bacterial killing of *S. aureus***

948 The killing assay of *S. aureus* with human PMNs was performed according to Brinkmann *et al.*, 2004  
949 (Brinkmann, Reichard et al. 2004). In brief, PMNs were seeded at a density of  $2 \times 10^6$  cells/mL and  
950 incubated with PMA (600 nM) for 2 h at 37 °C. Afterwards, the medium was carefully replaced with  
951 serum-free culture medium, containing 2% heat-inactivated pooled human serum with cytochalasin D  
952 (10  $\mu$ g/mL) and incubated further for 15 min before infection with bacteria. Cytochalasin D treatment  
953 did not affect NETs and this concentration was effective in blocking bacterial phagocytosis. To  
954 investigate whether naRNA of NETs was important in extracellular killing, samples were either treated  
955 with RNase A (Thermo Fisher, EN0531; 100  $\mu$ g/mL) or DNase I (Thermo Fisher, EN0521; 1 U/10  $\mu$ L) for  
956 2 h during NET formation, or after NET formation during the 30 min bacterial killing process. Samples  
957 were centrifuged at 700 x g for 10 min and incubated at 37 °C and 5% CO<sub>2</sub> for 30 minutes. Bacterial  
958 killing was measured as percentages of control values (bacteria incubated alone in media without  
959 neutrophils).

#### 960 **In vivo analysis of naRNA DAMP effects**

961 To investigate the effect of NETs with or without RNase inhibitors and the respective TLR signaling, 20  
962  $\mu$ L of NET content and the respective controls were injected into the ears of C57BL/6 and *Tlr13*<sup>-/-</sup> mice  
963 intradermally on day 0. Afterwards, as a measure of inflammation, the ear thickness was assessed  
964 using a manual caliper (0.01–10 mm, Peacock, Tokyo, Japan) until day 4.

965 **Neutrophil infiltration *in vivo* fluorescence imaging**

966 The *in vivo* experiment for investigating neutrophil infiltration was performed as described (Herster,  
967 Bittner et al. 2020). Briefly, LysM<sup>EGFP/+</sup> mice were injected intradermally with 20  $\mu$ L of PMA or Mock  
968 NET content or respective controls. LysM<sup>EGFP/+</sup> mice were then anesthetized with inhalation isoflurane  
969 and *in vivo* fluorescence imaging was performed using the IVIS Lumina II imaging system (Caliper). EGFP  
970 fluorescence was measured using excitation (465 nm), emission (515–575 nm), and exposure time  
971 (0.5 s). Data are quantified as total radiant efficiency ([photons/s]/[ $\mu$ W/cm<sup>2</sup>]) within a circular region  
972 of interest using Living Image software (Caliper).

973 **Imiquimod model of psoriatic skin inflammation**

974 To analyze the effect of RNA signaling in an *in vivo* model for psoriasis, the well-established imiquimod  
975 mouse model was used (Gilliet, Conrad et al. 2004). C57BL/6 and *Tlr13*<sup>-/-</sup> mice were used and, briefly,  
976 70  $\mu$ L (62.5 mg) of imiquimod (5%, Taro Pharmaceuticals Industries, Hawthorne, NY) was applied daily  
977 to both sides of a mouse ear for 5 consecutive days (day 0 to 4). Ear thickness was measured with a  
978 manual caliper (0.01–10 mm, Peacock, Tokyo, Japan) before imiquimod application. A day after the  
979 last application of imiquimod (day 5), full-thickness ear skin was excised with surgical scissors for  
980 histologic analysis.

981 **ELISA**

982 To measure cytokine release of BlaER-1, THP-1, N/TERT-1, NHEK, NK-92 MI, PBMCs and 3D human skin  
983 equivalent after stimulation with NET content and respective controls, ELISA Kits for hIL-8 (ELISA MAX™  
984 Deluxe Set Human IL-8, Biolegend, 431504), hIL-6 (ELISA MAX™ Deluxe Set Human IL-6, Biolegend,  
985 430504), IFN- $\gamma$  (ELISA MAX™ Deluxe Set Human IFN- $\gamma$ , Biolegend, 430104), and TNF (TNF alpha Human  
986 Uncoated ELISA Kit, Invitrogen, 88-7346-88) were used according to the manufacturer's instructions.  
987 Samples were assessed in triplicates.

988 **qPCR analysis of IL-8 expression of 3D human skin equivalent**

989 To investigate IL-8 expression of 3D human skin equivalent after stimulation with NET contents, qPCR  
990 analysis was performed. First, total RNA was isolated using the RNeasy Mini Kit (Qiagen, 74106) for  
991 animal tissues and cells. For cDNA preparation, the High-Capacity RNA-to-cDNA-Kit (Thermo Fisher,  
992 4387406) was used according to the manufacturer's instructions. For the qPCR, the TaqMan™ system  
993 was used. Briefly, a master mix of TaqMan™ Universal Mastermix II (Thermo Fisher, 4440040) and  
994 TaqMan™ Gene Expression Assay (Thermo Fisher, 4448892) was prepared according to the  
995 manufacturer's instructions. For one reaction, 5.5  $\mu$ L master mix and 4.5  $\mu$ L of the respective cDNA (IL-  
996 8 and TBP) were mixed and the qPCR was run. Analysis in triplicates was performed using QuantStudio  
997 Real-Time-PCR software version 1.3 (Thermo Fisher).

998 **Supplementary Tables**

999 **Supplementary Table 1: commercial TLR ligands and inhibitors; enzymes**

| Component                  | Company       | Product no.       |
|----------------------------|---------------|-------------------|
| Cl-amidine                 | Merck         | 506282            |
| CpG PTO 2006               | TIB Molbiol   | n/a, see Table S2 |
| CU-CPT9a                   | Invivogen     | inh-cc9a          |
| DNase I                    | Thermo Fisher | EN0521            |
| DNase inhibitor 50 mM EDTA | Thermo Fisher | EN0521            |
| DOTAP                      | Roth          | L787.2            |
| Ionomycin                  | Sigma         | I0634-1MG         |
| LL37                       | Invivogen     | tlrl-l37          |
| LPS-EK (ultrapure)         | Invivogen     | tlrl-pekips       |
| Nigericin                  | Invivogen     | tlrl-nig          |
| PMA                        | Invivogen     | tlrl-pma          |
| R848 (Resiquimod)          | Invivogen     | tlrl-r848         |
| RNase A                    | Thermo Fisher | EN0531            |
| RNase inhibitor            | Promega       | N2615             |
| TL8-506                    | Invivogen     | tlrl-tl8506       |

1000

1001 **Supplementary Table 2: Nucleic acid TLR agonists**

| Component    | Sequence                                        | Backbone         | Company    |
|--------------|-------------------------------------------------|------------------|------------|
| RNA40        | 5'GsCsCsGsUsCsUsGsUsUsGsUsGsUsGsAsCsUsC3'       | Phosphorothioate | Eurogentec |
| CpG PTO 2006 | 5'TsCsGsTsCsGsTsTsTsGsTsCsGsTsTsTsGsTsCsGsTsT3' | Phosphorothioate | TIB        |

1002

1003 **Supplementary Table 3: Antibodies and conjugation kit**

| Item                               | Fluorophore | Species | Isotype | Company | Product no.  |
|------------------------------------|-------------|---------|---------|---------|--------------|
| Anti-hLL37                         | DyLight 550 | Rabbit  | IgG     | LSBio   | LS-B6696-500 |
| DyLight 550 Conjugation Kit (Fast) | DyLight 550 | -       | -       | Abcam   | ab201800     |

|                                         |              |         |                     |                             |                   |
|-----------------------------------------|--------------|---------|---------------------|-----------------------------|-------------------|
| Anti-rRNA (Y10b)                        | unconjugated | mouse   | IgG <sub>2a</sub> K | Santa Cruz<br>Biotechnology | sc-33678          |
| Anti-rRNA (Y10b) Alexa<br>Fluor® 647    | AF647        | mouse   | IgG <sub>2a</sub> K | Santa Cruz<br>Biotechnology | sc-33678<br>AF647 |
| Anti-mouse IgG                          | AF647        | Chicken | IgY                 | Thermo Fisher               | A-21463           |
| Hoechst 33342                           |              | -       | -                   | Thermo Fisher               | H21492            |
| SYTO RNaselect Green<br>fluorescent dye |              | -       | -                   | Thermo Fisher               | S32703            |

1004

1005 **Supplementary Table 4: Click chemistry reagents**

| Reagent                                                           | Company         | Product no.    |
|-------------------------------------------------------------------|-----------------|----------------|
| AF546-Azide                                                       | Jena Bioscience | CLK-1283-1     |
| Aminoguanidine-Hydrochloride                                      | Merck           | 396494-25G     |
| CuSO <sub>4</sub> -click chemistry grade                          | Jena Bioscience | CLK-MI004-50.1 |
| 5-Ethynyluridine                                                  | Jena Bioscience | CLK-N002-10    |
| Na-Ascorbate-click chemistry grade                                | Jena Bioscience | CLK-MI005-1G   |
| THPTA (Tris((1-hydroxy-propyl-1H-1,2,3-triazol-4-yl)methyl)amine) | Jena Bioscience | CLK-1010-25    |

1006

1007

1008 **Supplementary Table 5: Plasmids used for HEK293T transfection**

| Plasmid name insert | Vector backbone | Insert                    |
|---------------------|-----------------|---------------------------|
| NF-κB reporter      | pGL3            | 6x NF-κB response element |
| Renilla             | pRL-TK          | Renilla                   |
| hTLR7               | pcDNA3.1 (+)    | hTLR7                     |
| hTLR8               | pcDNA3.1 (+)    | hTLR8                     |
| hTLR9               | pSEM-hTLR9      | hTLR9                     |

1009

1010 **Supplementary Table 6: primers used for qPCR**

| Gene              | Assay number  |
|-------------------|---------------|
| IL-8              | Hs00174103_m1 |
| TBP (housekeeper) | HS00427620_m1 |

1011

1012 **Supplementary Table 7: 10x Ammonium chloride erythrocyte lysis buffer**

| Compound                                       | Company        | Product no. |
|------------------------------------------------|----------------|-------------|
| 1.54 M NH <sub>4</sub> Cl                      | Roth           | 5470.1      |
| 100 mM KHCO <sub>3</sub>                       | Fluka          | 60220       |
| 1 mM EDTA; pH 8                                | Thermo Fisher  | 15575020    |
| dissolved in Ampuwa water                      | Fresenius Kabi | 1833        |
| pH adjusted to 7.3, sterile filtered (0.22 μm) |                |             |

1013

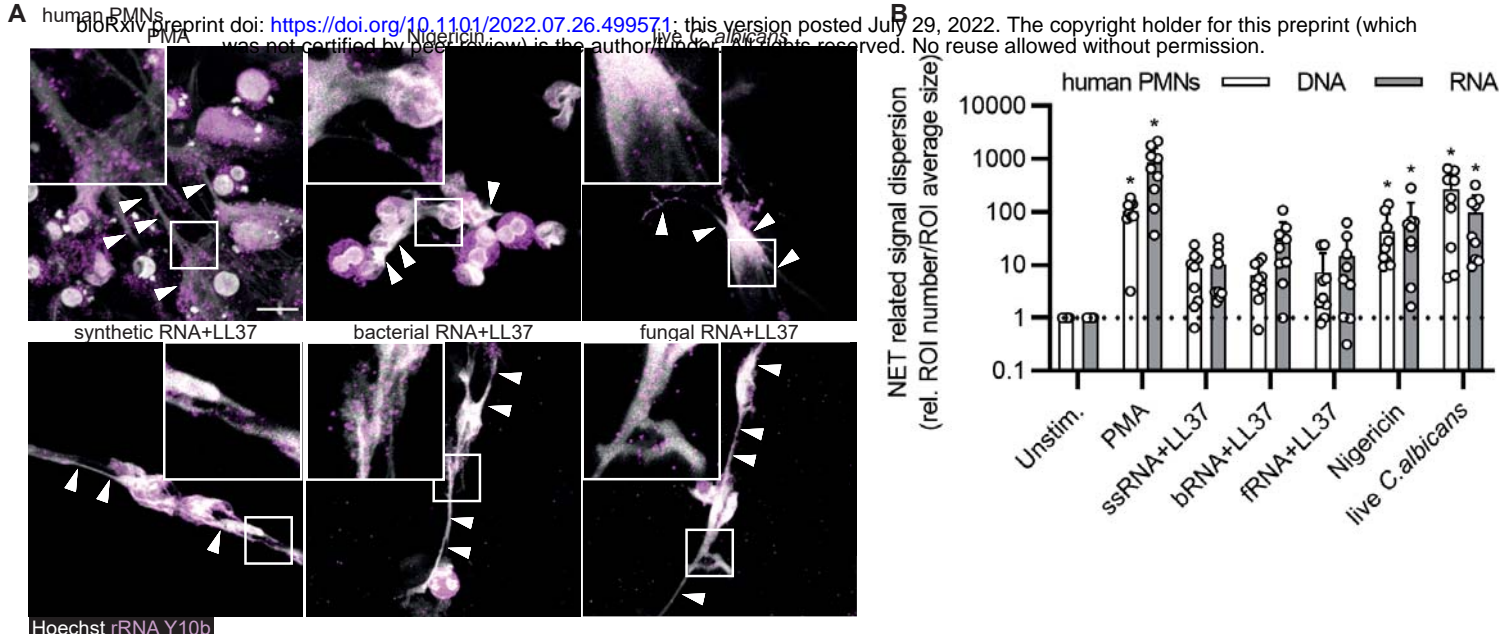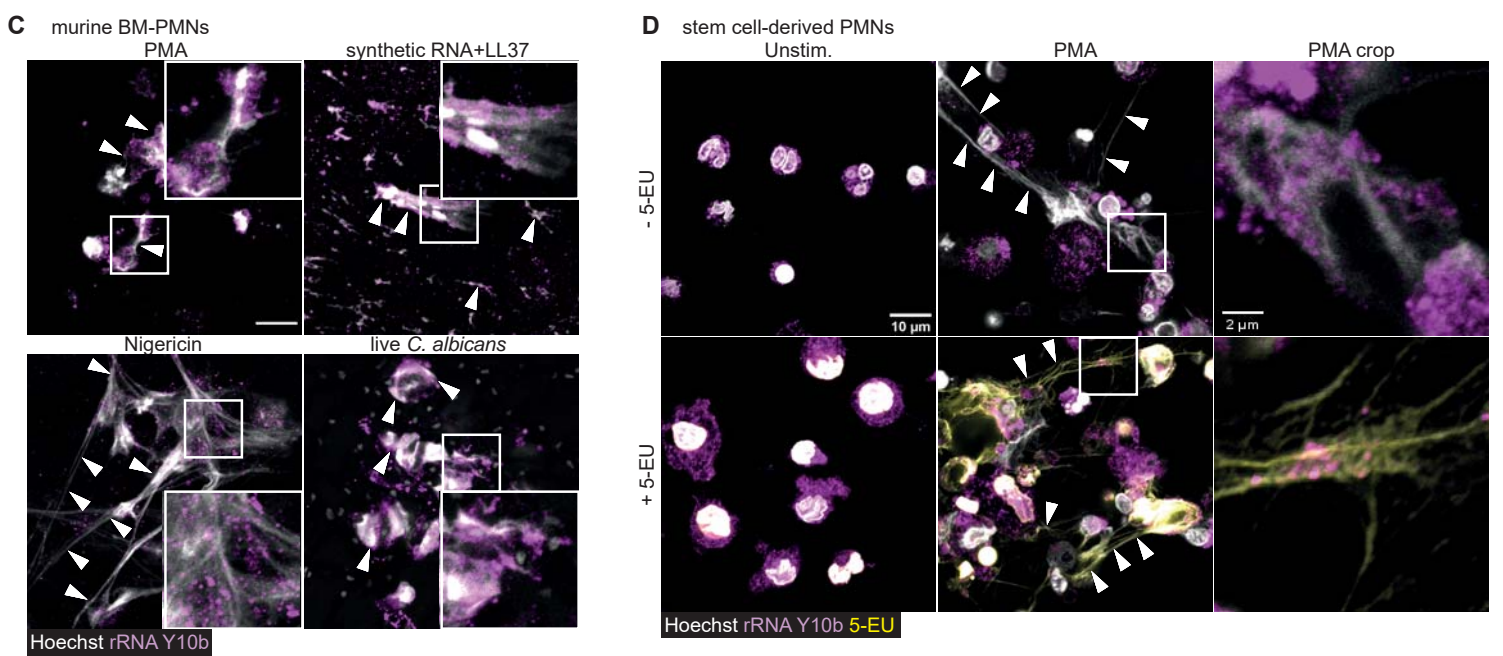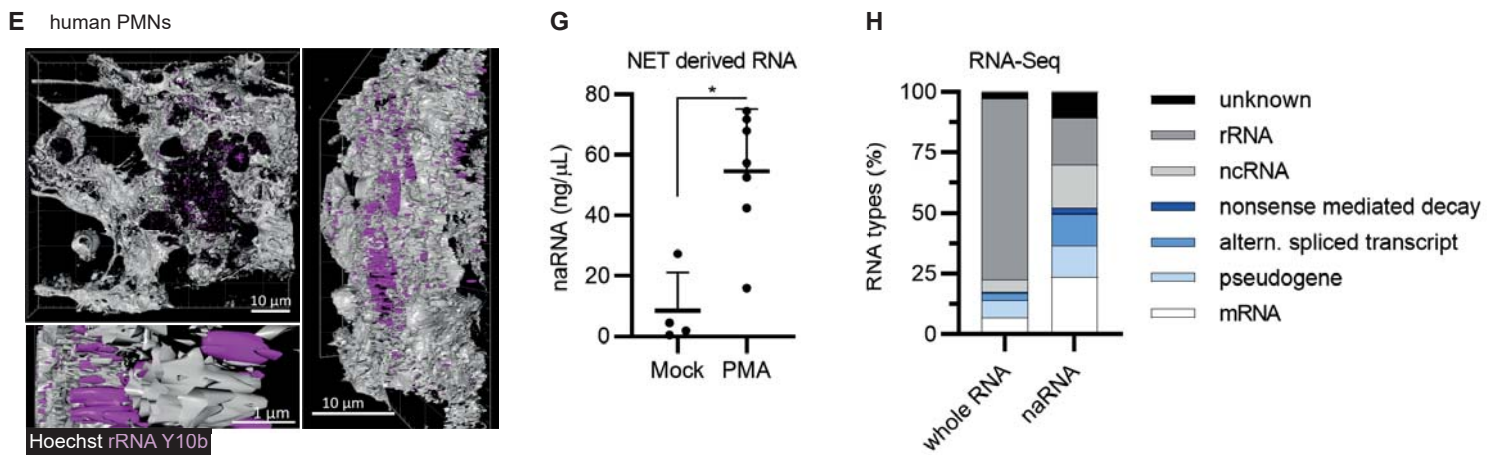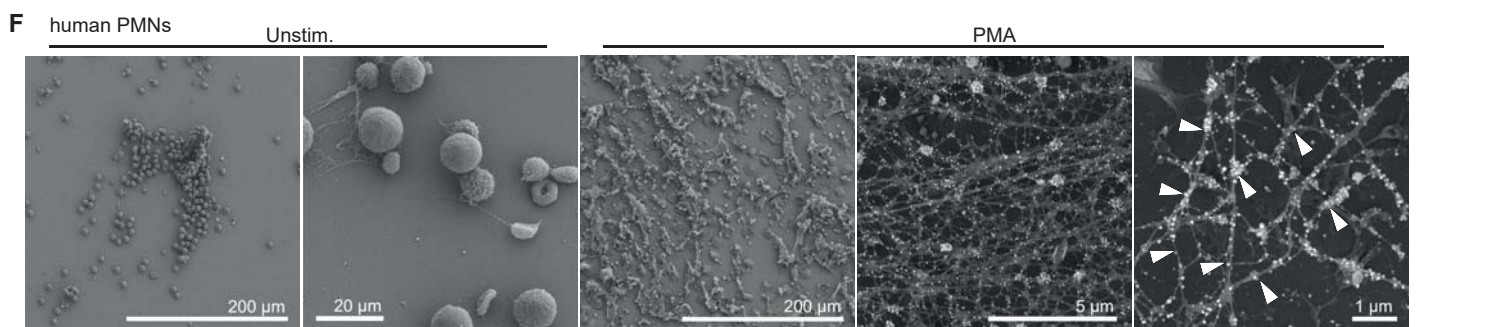

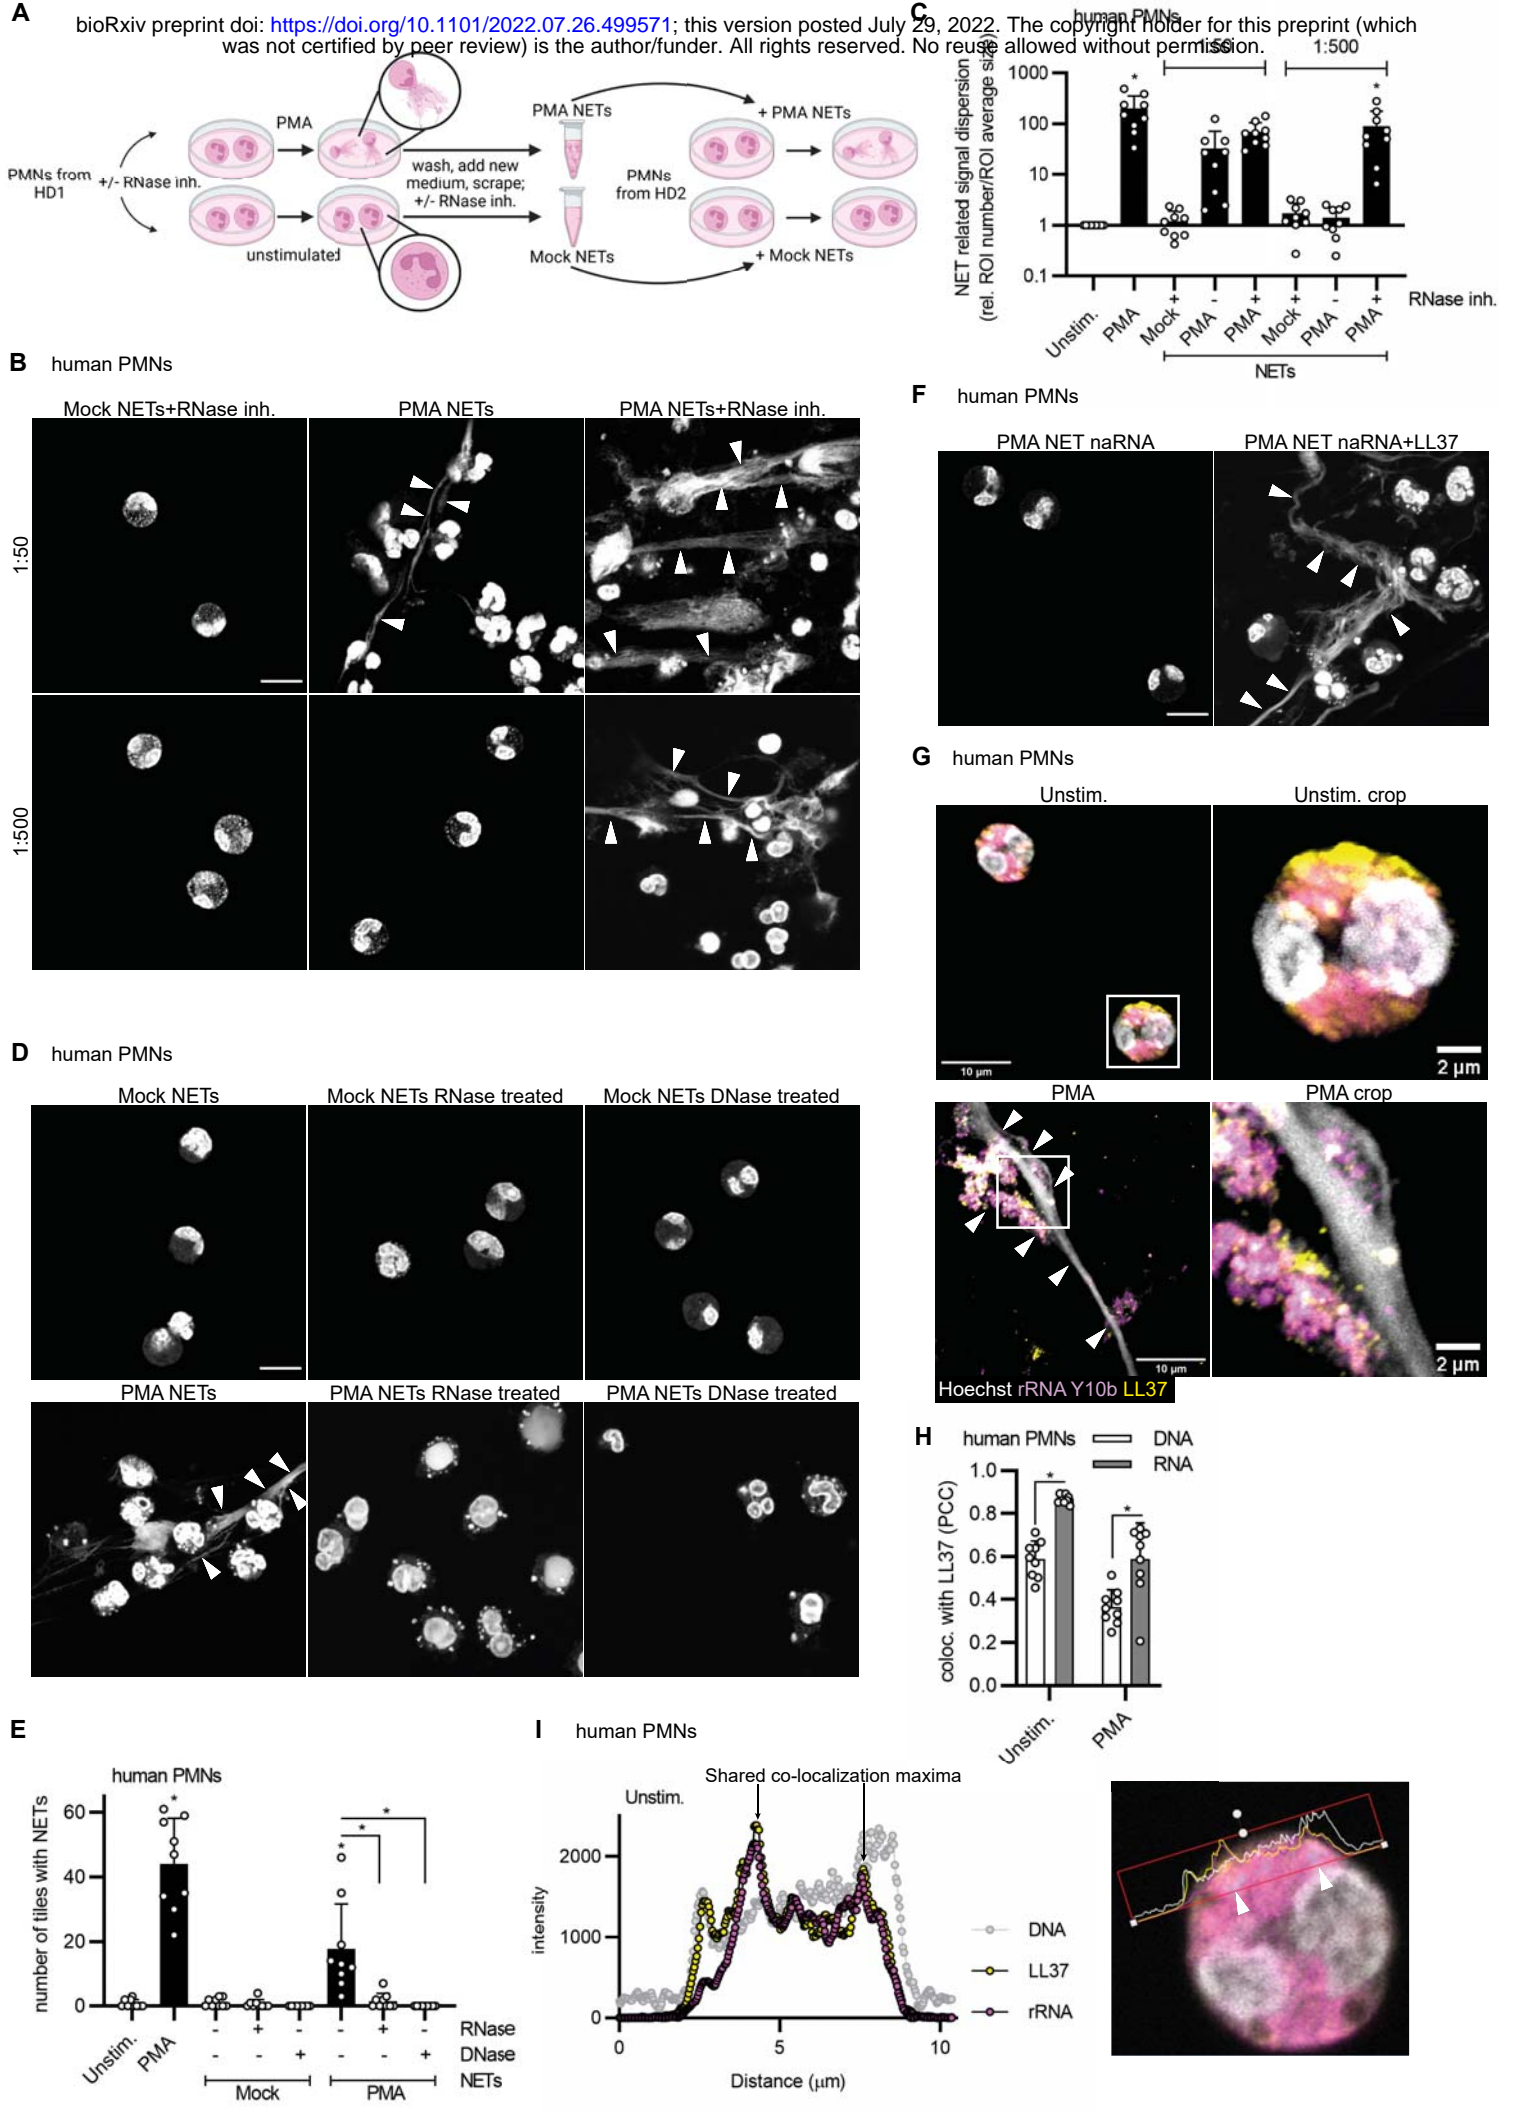



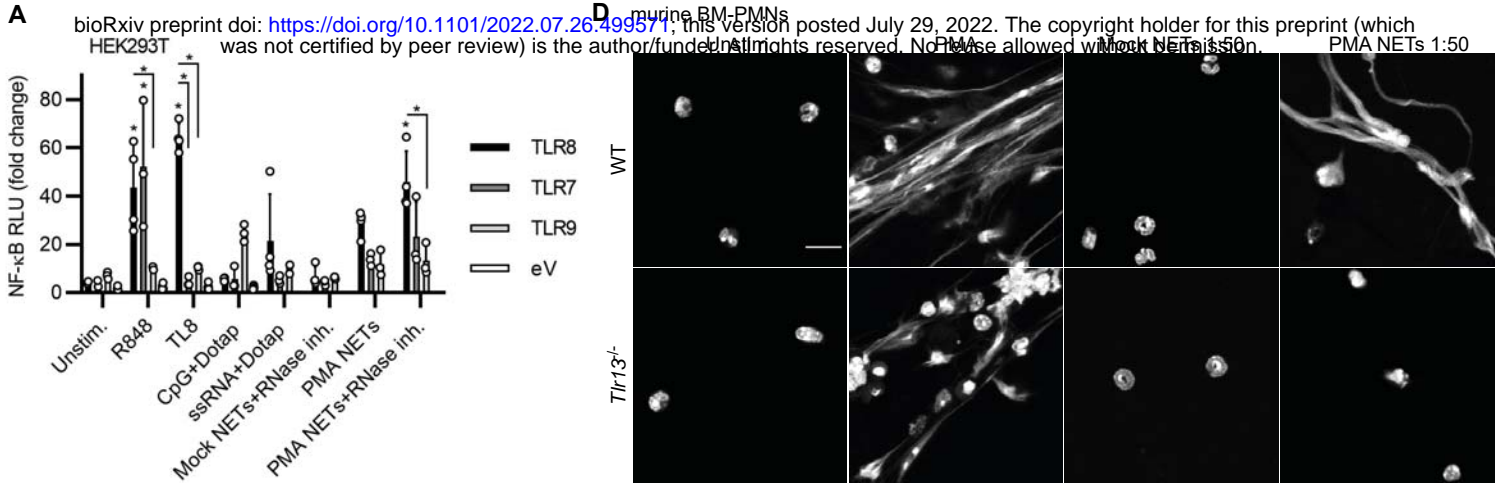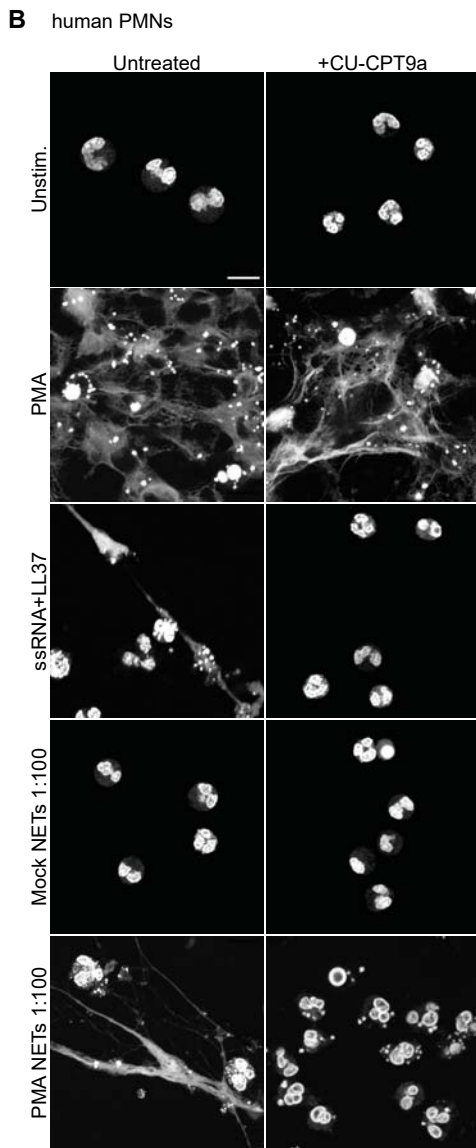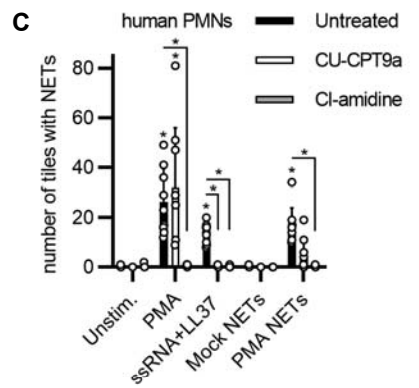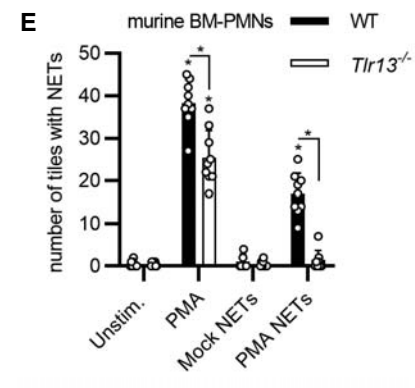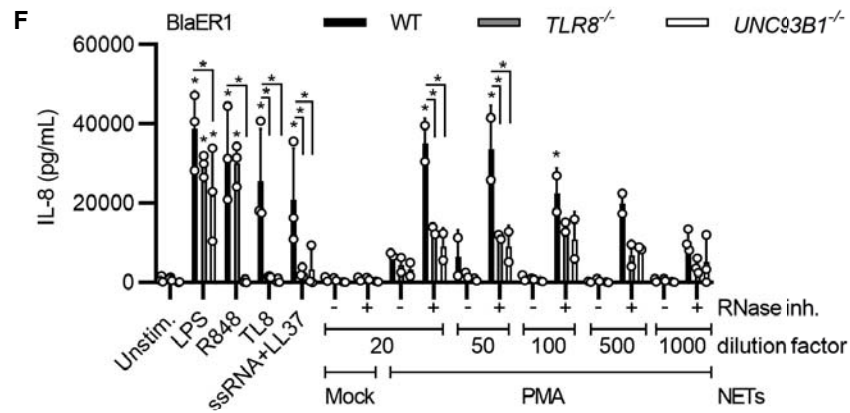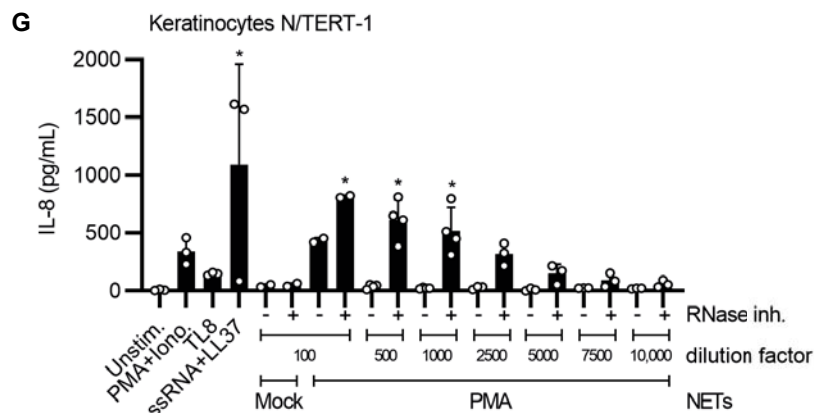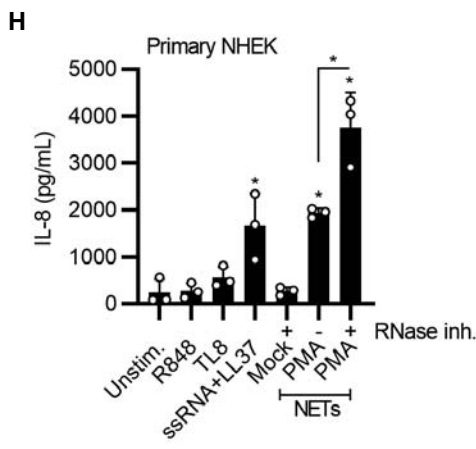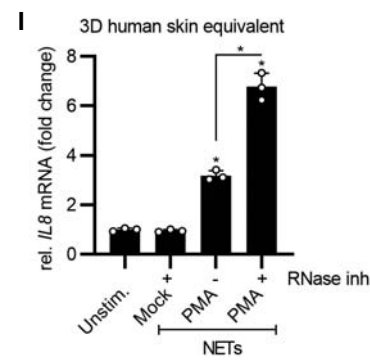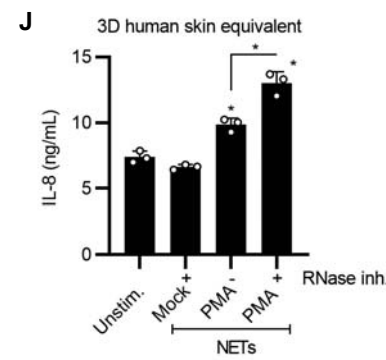

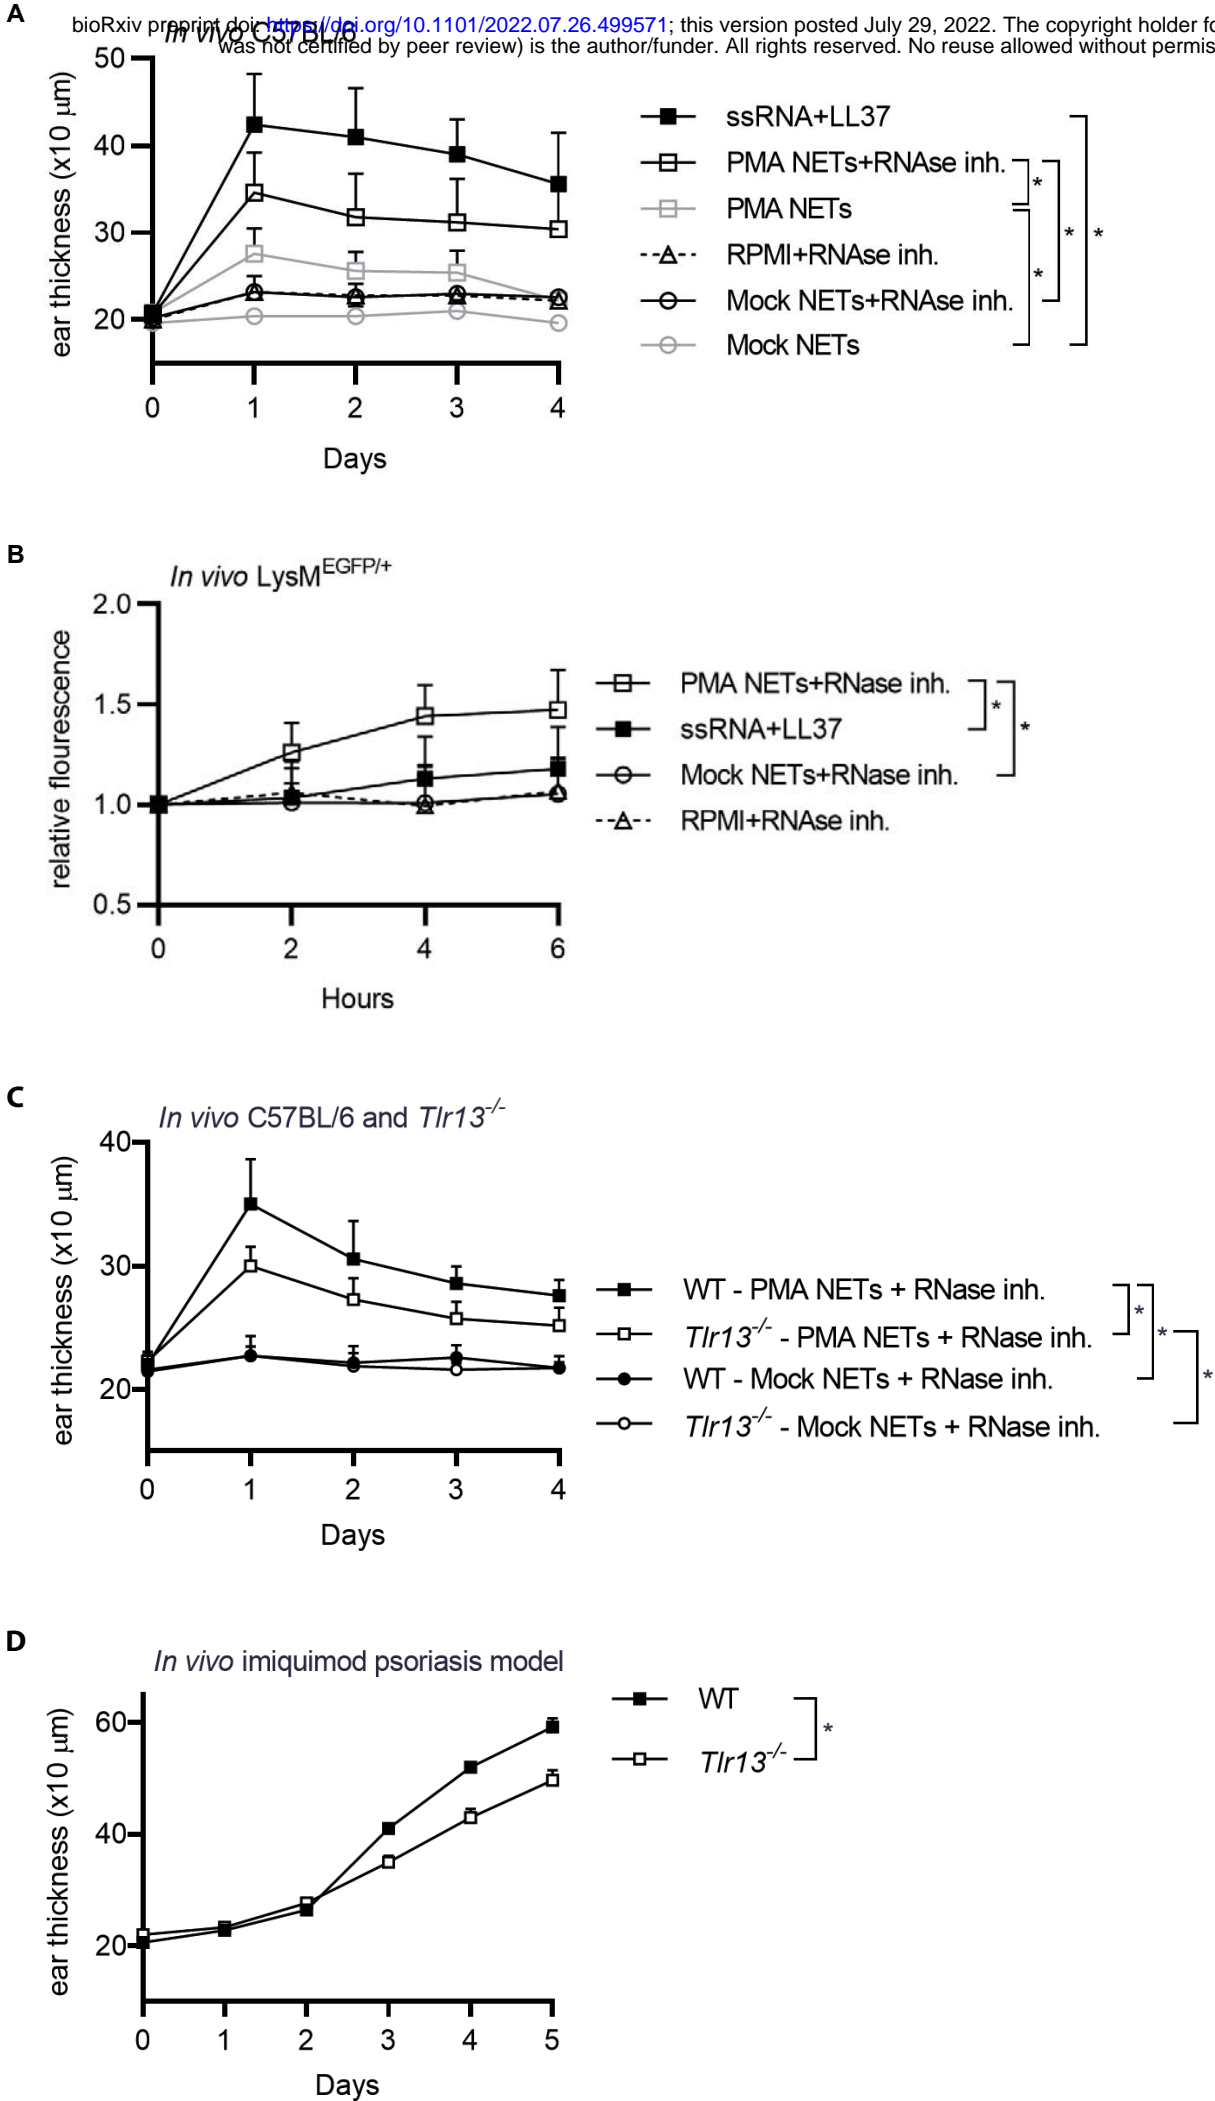

Source: https://www.biorxiv.org/content/10.1101/2022.07.26.499571v2.full.pdf
